# Supplementary material
Source: PubMed Central journal article supplement (PMC4877252)
Supplement: NIHMS760345-supplement.pdf [file NIHMS760345-supplement.pdf]

## Contents

|                                                                                                                                                                                          |    |
|------------------------------------------------------------------------------------------------------------------------------------------------------------------------------------------|----|
| Figure S1. Completion of Follow-up .....                                                                                                                                                 | 2  |
| Figure S2. Change in Visual Acuity from Baseline to 2 Year by Treatment Group According to Baseline Visual Acuity .....                                                                  | 3  |
| Figure S3. Mean Change in Visual Acuity over Time in the Cohort of Participants Completing the 2 Year Visit .....                                                                        | 4  |
| Figure S4. Proportion of Eyes with >10 Letter Improvement in Visual Acuity over Time, .....                                                                                              | 5  |
| Figure S5. Mean change in VA over Time by Baseline Visual Acuity and Central Subfield Thickness.....                                                                                     | 6  |
| Figure S6. 2 Year Anti-Platelet Trialists' Collaboration (APTC) <sup>5</sup> Event Rates Across DME Studies of Anti-VEGF Agents .....                                                    | 7  |
| Table S1: Baseline Characteristics in Participants Completing vs. Not Completing the 2 Year Visit.....                                                                                   | 8  |
| Table S2. Visits and Treatment for Diabetic Macular Edema Overall .....                                                                                                                  | 9  |
| Table S3. Visual Acuity at 2 Years – Overall.....                                                                                                                                        | 12 |
| Table S4. Visual Acuity at 2 Year: Sensitivity Analysis .....                                                                                                                            | 14 |
| Table S5. Detailed Distribution of Visual Acuity at 2 Years According to Baseline Visual Acuity Subgroup .                                                                               | 16 |
| Table S6 Change in Visual Acuity Letter Score from Baseline to 2 Year: Additional Pre-Planned Subgroup Analyses.....                                                                     | 17 |
| Table S7. Optical Coherence Tomography Central Subfield Thickness Outcomes Overall.....                                                                                                  | 18 |
| Table S8. Change in Retinal Volume from Baseline to 2 Year .....                                                                                                                         | 19 |
| Table S9. Pre-Specified Systemic Adverse Events through 2 Year: Stratified by Whether Bilateral Study Drug was Received at any Time During the Study .....                               | 20 |
| Table S10. Post Hoc Analysis: Antiplatelet Trialists' Collaboration Events through 2 Year: Stratified by Whether Participant had Myocardial Infarction or Stroke Prior to Baseline ..... | 21 |
| Table S11. Post Hoc Analysis: Events by Medical Dictionary for Regulatory Activities System Organ Class at any Time During the Study .....                                               | 22 |
| Table S12. Post Hoc Analysis: Cardiovascular Events at any Time During the Study.....                                                                                                    | 23 |
| Table S13. All Ocular Events Occurring in the Study Eye.....                                                                                                                             | 25 |
| Table S14. All Ocular Adverse Events Occurring in the Non-Study Eye from the First Non-Study Eye Injection.....                                                                          | 29 |
| Table S15. All Systemic Adverse Events .....                                                                                                                                             | 32 |
| Table S16. 2 Year Anti-Platelet Trialists' Collaboration (APTC) <sup>5</sup> Event Rates Across DME and AMD Studies Comparing Ranibizumab vs. Control or Other Anti-VEGF Agents .....    | 45 |
| References.....                                                                                                                                                                          | 46 |

**Figure S1. Completion of Follow-up**

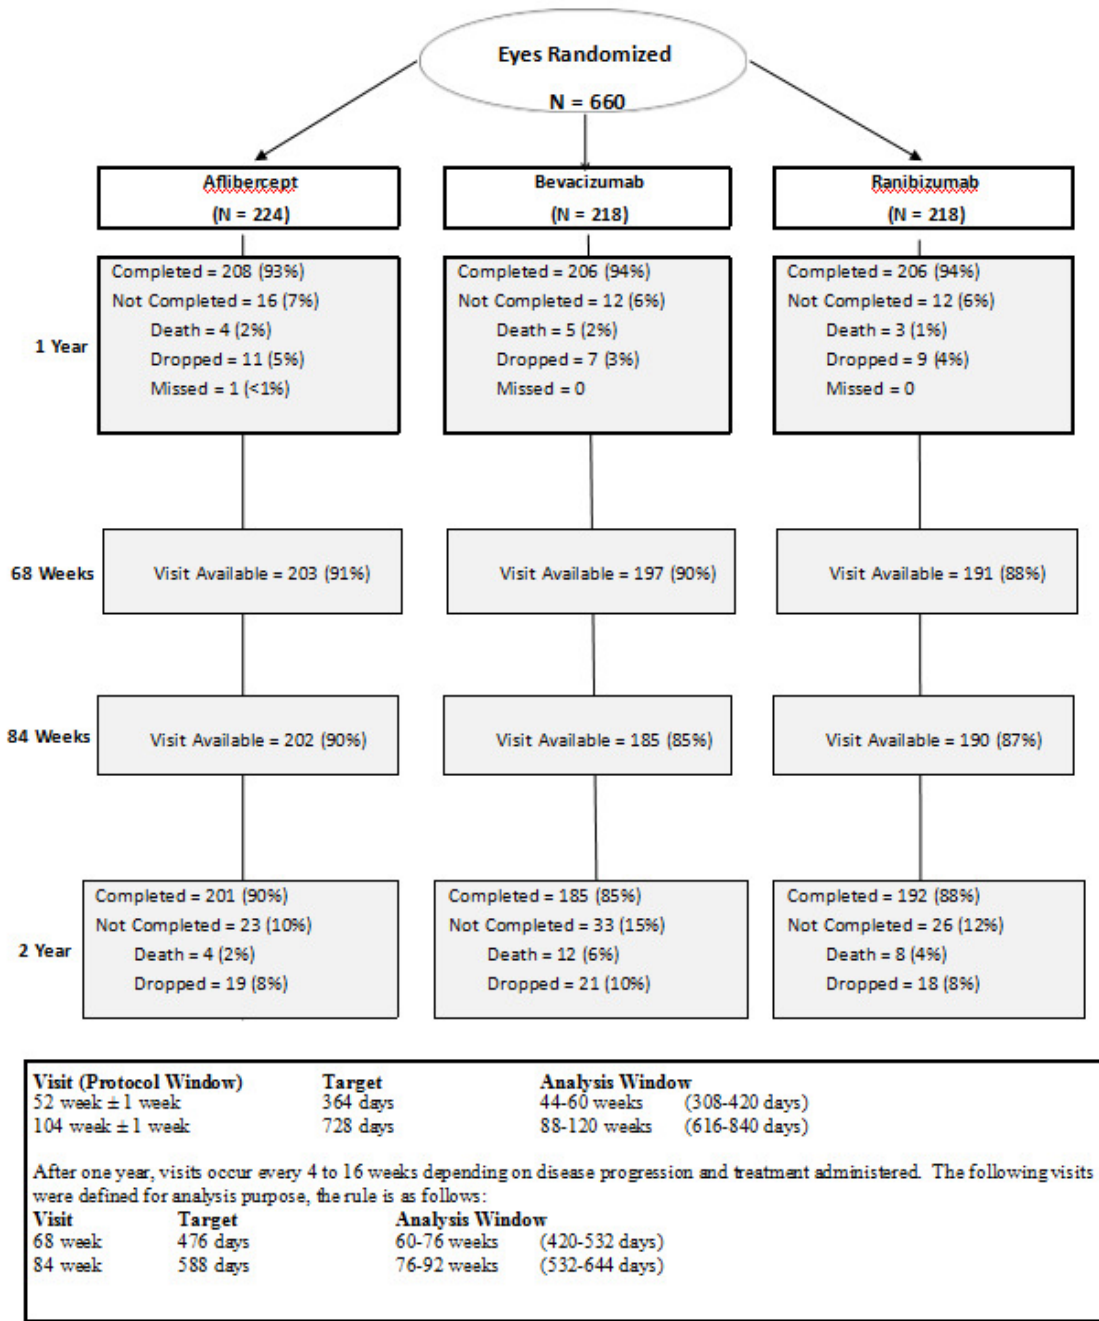

Note: 13 patients dropped prior to 2 year but had a Post 52wk in analysis window counted as a “Completed” 2 year in A=2, B=4, R=7. 1 A, 1 B, and 3 R were deaths, so the number of deaths in the AE tables will be this many more than the number in the flow chart.

**Figure S2. Change in Visual Acuity from Baseline to 2 Year by Treatment Group According to Baseline Visual Acuity**

Figure S2A

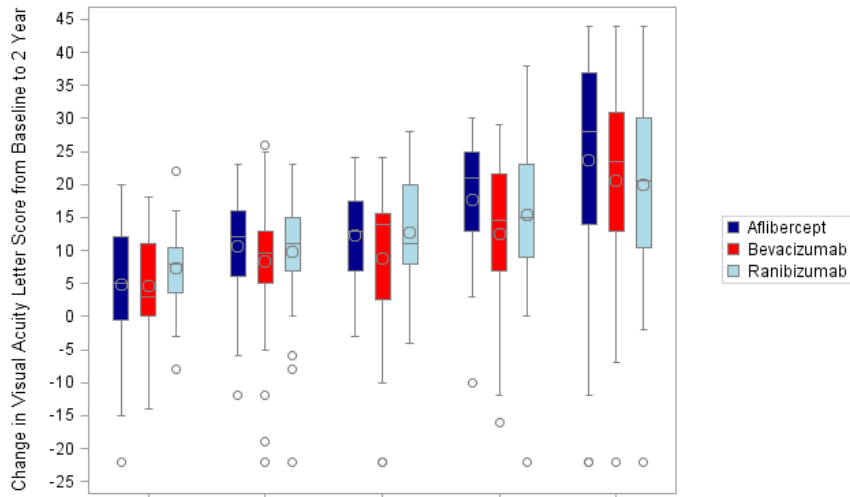

Figure S2B

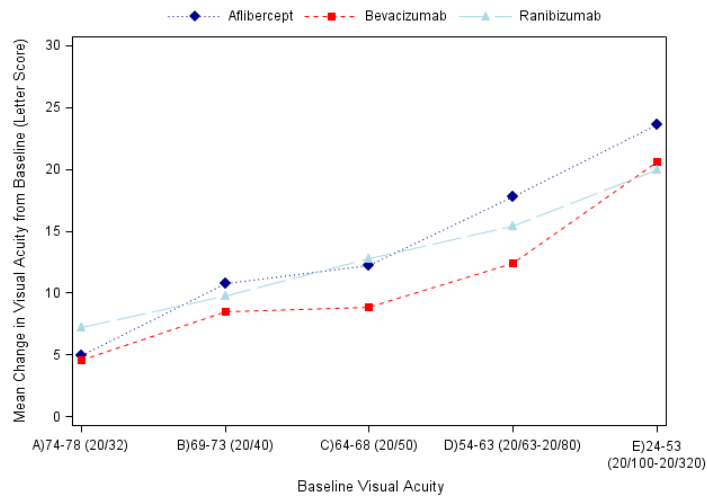

Number of participants

|             |    |    |    |    |    |
|-------------|----|----|----|----|----|
| Aflibercept | 52 | 51 | 32 | 29 | 37 |
| Bevacizumab | 39 | 54 | 32 | 36 | 24 |
| Ranibizumab | 44 | 53 | 29 | 33 | 32 |

Change in visual acuity from baseline to 2 year, truncated to 3 standard deviations from the mean; stratified by baseline visual acuity (letter score and Snellen equivalent). **Panel A:** Box plots showing distribution of 2-year change in visual acuities; the horizontal line represents the median, the circle represents the mean, the ends of the box represent the 25th and 75th percentiles, the lines extending from each bar represent values up to 1.5\*IQR, and the small circles represent outlier values beyond 1.5\*IQR. **Panel B:** Mean change in visual acuity at 2 year.

**Figure S3. Mean Change in Visual Acuity over Time in the Cohort of Participants Completing the 2 Year Visit, A) Overall; B) and C) Stratified by baseline visual acuity (approximate Snellen equivalent): 20/50 or worse (B) and 20/32-20/40 (C). Change in visual acuity was truncated to 3 standard deviations from the mean. The number of eyes at each time point ranged from 187-201 in the aflibercept group, 171-185 in the bevacizumab group, and 176-191 in the ranibizumab group**

Figure S3A

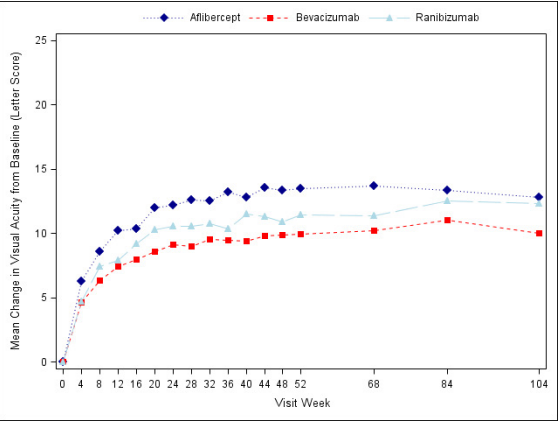

Figure S3B

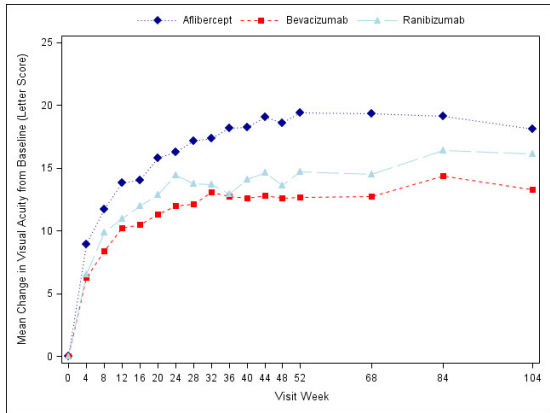

Figure S3C

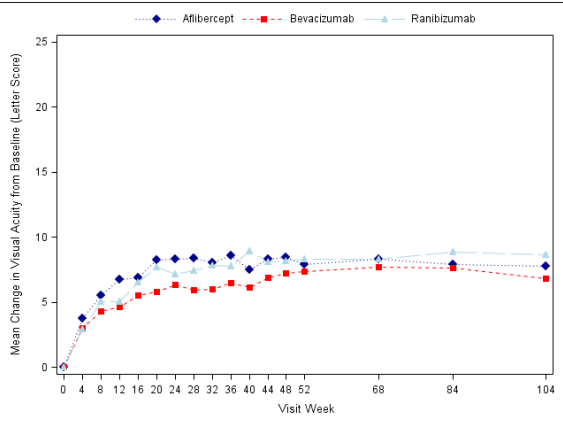

**Figure S4. Proportion of Eyes with  $\geq 10$  Letter Improvement in Visual Acuity over Time, A) Overall; B) and C) Stratified by baseline visual acuity (approximate Snellen equivalent): 20/50 or worse (B) and 20/32-20/40 (C). The number of eyes at each time point ranged from 195-224 in the aflibercept group, 185-218 in the bevacizumab group, and 188-218 in the ranibizumab group (see Figure S1 in the Supplementary Appendix and Figure S2 in the 1 Year Supplementary Appendix<sup>1</sup> for the number at each time point).**

Figure S4A

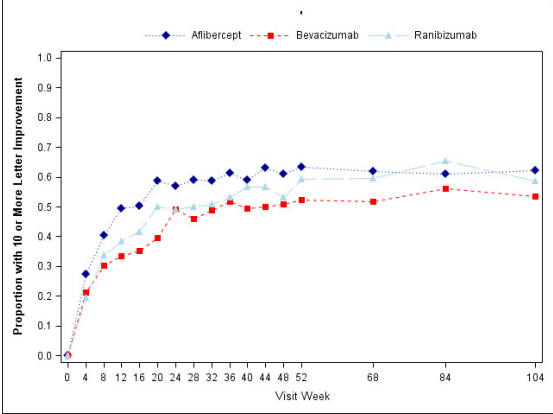

Figure S4B

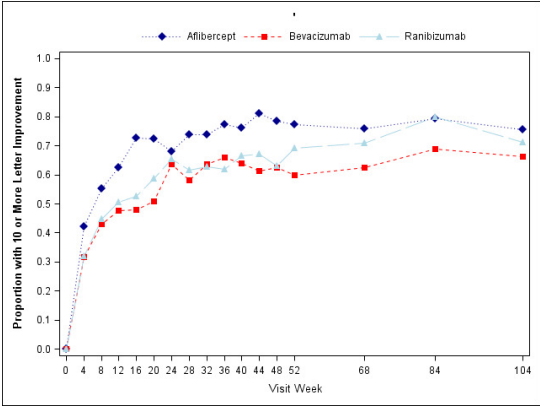

Figure S4C

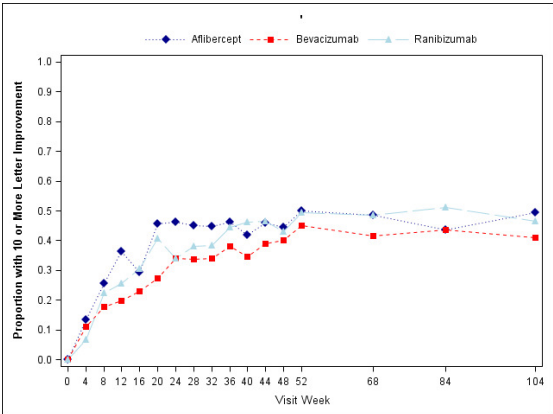

**Figure S5. Mean change in VA over Time by Baseline Visual Acuity and Central Subfield Thickness.**

A. Worse VA and thicker. B. Worse VA and thinner C. Better VA and thicker. D. Better VA and thinner.

Central subfield thickness values were translated to a Stratus equivalent thickness. The number of eyes at the 104 week time point for panels A, B, C, D, respectively, were: 58, 39, 31, 71 in the aflibercept group, 56, 34, 26, 67 in the bevacizumab group, and 46, 46, 38, 58 in the ranibizumab group

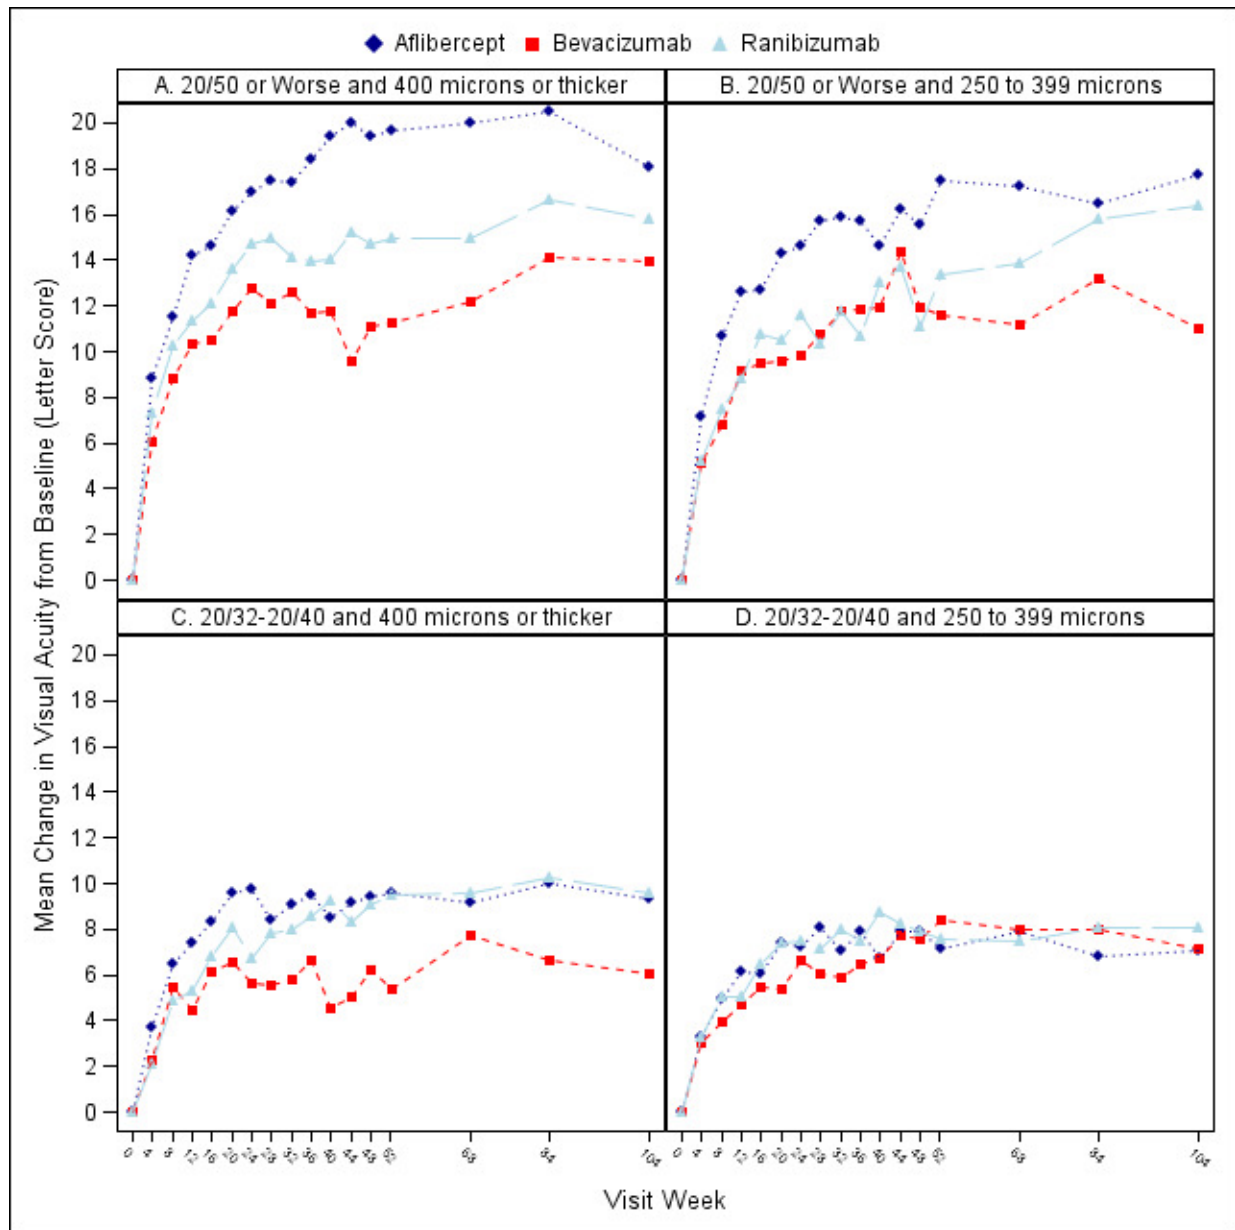

Figure S6. 2 Year Anti-Platelet Trialists' Collaboration (APTC)<sup>5</sup> Event Rates Across DME Studies of Anti-VEGF Agents

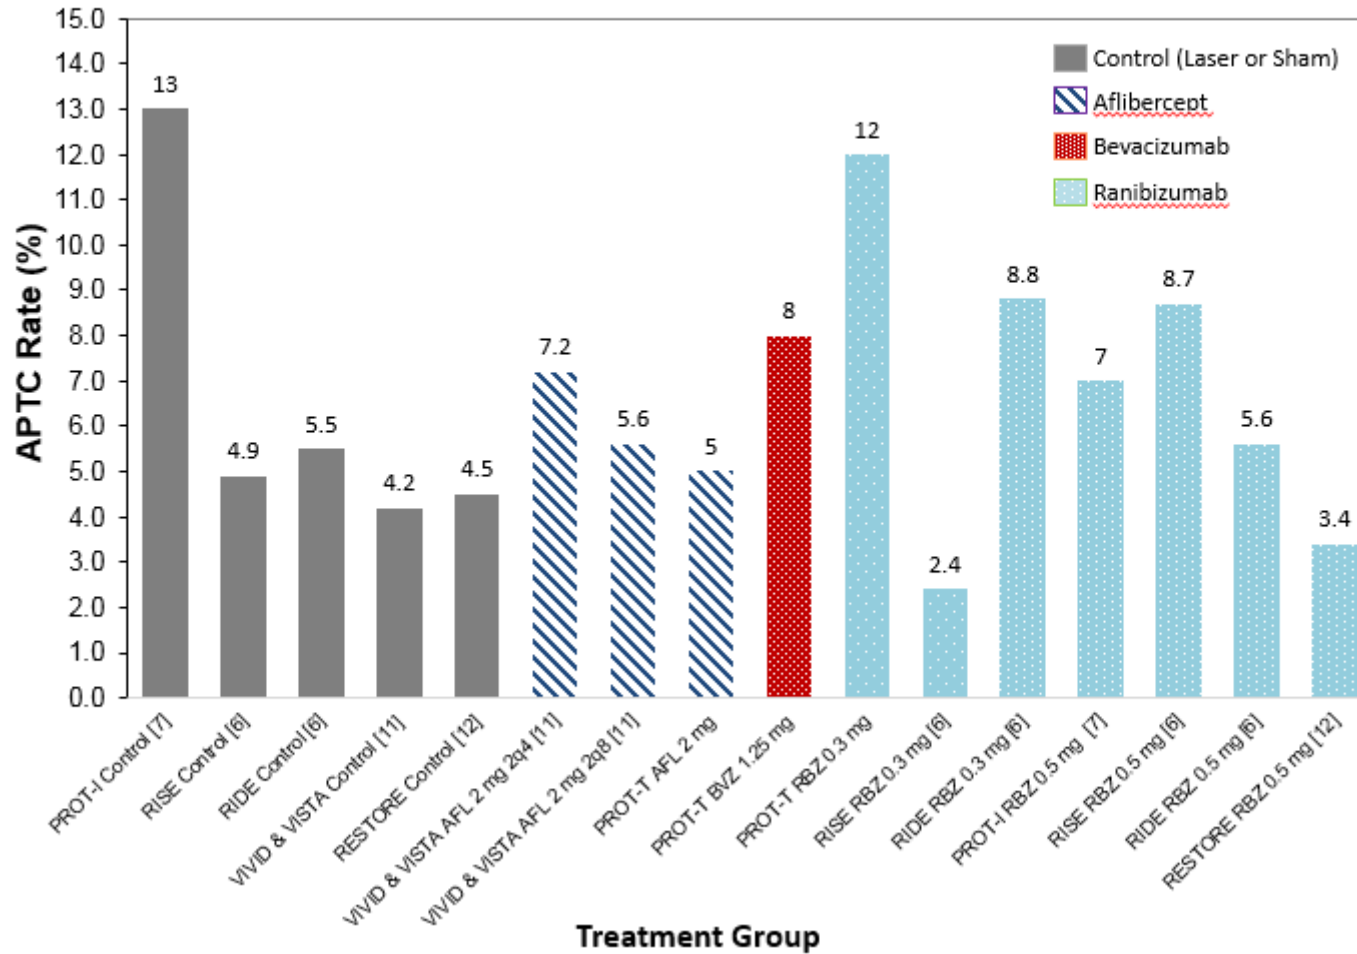

**Table S1: Baseline Characteristics in Participants Completing vs. Not Completing the 2 Year Visit**

|                                                       | Completed 2 Year Visit   |                          |                          | Did Not Complete 2 Year Visit (includes lost to follow up, withdrawn, death) |                         |                         |
|-------------------------------------------------------|--------------------------|--------------------------|--------------------------|------------------------------------------------------------------------------|-------------------------|-------------------------|
|                                                       | Aflibercept<br>(N = 201) | Bevacizumab<br>(N = 185) | Ranibizumab<br>(N = 192) | Aflibercept<br>(N = 23)                                                      | Bevacizumab<br>(N = 33) | Ranibizumab<br>(N = 26) |
| <b>Participant Characteristics</b>                    |                          |                          |                          |                                                                              |                         |                         |
| Sex: Female - N (%)                                   | 93 (46%)                 | 91 (49%)                 | 85 (44%)                 | 17 (74%)                                                                     | 12 (36%)                | 9 (35%)                 |
| Age (yrs) - Median (25th, 75th percentile)            | 61 (54, 66)              | 62 (56, 68)              | 59 (53, 67)              | 56 (52, 64)                                                                  | 64 (59, 72)             | 58 (52, 62)             |
| Race/Ethnicity - N (%)                                |                          |                          |                          |                                                                              |                         |                         |
| White                                                 | 133 (66%)                | 120 (65%)                | 129 (67%)                | 12 (52%)                                                                     | 19 (58%)                | 17 (65%)                |
| Black/African-American                                | 27 (13%)                 | 31 (17%)                 | 33 (17%)                 | 5 (22%)                                                                      | 6 (18%)                 | 3 (12%)                 |
| Hispanic                                              | 32 (16%)                 | 30 (16%)                 | 26 (14%)                 | 5 (22%)                                                                      | 6 (18%)                 | 4 (15%)                 |
| Asian                                                 | 2 (<1%)                  | 2 (1%)                   | 2 (1%)                   | 0                                                                            | 0                       | 2 (8%)                  |
| Native Hawaiian/other Pacific Islander                | 1 (<1%)                  | 1 (<1%)                  | 0                        | 1 (4%)                                                                       | 1 (3%)                  | 0                       |
| American Indian/Alaskan Native                        | 1 (<1%)                  | 0                        | 0                        | 0                                                                            | 0                       | 0                       |
| More than one race                                    | 4 (2%)                   | 1 (<1%)                  | 1 (<1%)                  | 0                                                                            | 0                       | 0                       |
| Unknown/not reported                                  | 1 (<1%)                  | 0                        | 1 (<1%)                  | 0                                                                            | 1 (3%)                  | 0                       |
| Diabetes Type - N (%)                                 |                          |                          |                          |                                                                              |                         |                         |
| Type 1                                                | 21 (10%)                 | 11 (6%)                  | 15 (8%)                  | 1 (4%)                                                                       | 1 (3%)                  | 1 (4%)                  |
| Type 2                                                | 174 (87%)                | 173 (94%)                | 173 (90%)                | 22 (96%)                                                                     | 32 (97%)                | 23 (88%)                |
| Uncertain                                             | 6 (3%)                   | 1 (<1%)                  | 4 (2%)                   | 0                                                                            | 0                       | 2 (8%)                  |
| Duration of Diabetes (yrs) -                          |                          |                          |                          |                                                                              |                         |                         |
| Median (25th, 75th percentile)                        | 15 (8, 21)               | 17 (11, 25)              | 16 (12, 24)              | 15 (8, 21)                                                                   | 15 (10, 20)             | 17 (7, 21)              |
| Hemoglobin A1c (%) - Median (25th, 75th percentile)*  |                          |                          |                          |                                                                              |                         |                         |
|                                                       | 7.6 (6.8, 9.0)           | 7.6 (6.7, 8.8)           | 8.0 (6.9, 9.3)           | 7.9 (6.8, 9.6)                                                               | 8.0 (7.2, 8.8)          | 7.6 (6.6, 8.2)          |
| <b>Ocular Characteristics</b>                         |                          |                          |                          |                                                                              |                         |                         |
| Visual Acuity Letter Score -                          |                          |                          |                          |                                                                              |                         |                         |
| Median (75th, 25th percentile)                        | 69 (59, 74)              | 69 (60, 73)              | 69 (60, 73)              | 68 (59, 73)                                                                  | 69 (59, 72)             | 65 (54, 71)             |
| ~ Snellen Equivalent - Median (75th, 25th percentile) |                          |                          |                          |                                                                              |                         |                         |
|                                                       | 20/40 (20/63, 20/32)     | 20/40 (20/63, 20/40)     | 20/40 (20/63, 20/40)     | 20/50 (20/63, 20/40)                                                         | 20/40 (20/63, 20/40)    | 20/50 (20/80, 20/40)    |
| OCT Central Subfield ( $\mu\text{m}$ ) <sup>†</sup> - |                          |                          |                          |                                                                              |                         |                         |
| Median (25th, 75th percentile)                        | 385 (312, 462)           | 377 (308, 478)           | 387 (306, 477)           | 477 (283, 569)                                                               | 370 (292, 467)          | 421 (345, 554)          |
| OCT Retinal Volume ( $\text{mm}^3$ ) <sup>‡</sup> -   |                          |                          |                          |                                                                              |                         |                         |
| Median (25th, 75th percentile)                        | 8.4 (7.7, 10.0)          | 8.4 (7.4, 9.8)           | 8.7 (7.7, 9.6)           | 9.8 (8.3, 10.9)                                                              | 8.0 (7.4, 10.4)         | 9.5 (7.7, 10.4)         |

\*Hemoglobin A1c missing for 5 in the completers aflibercept group, 1 in the non-completers ranibizumab group.

<sup>†</sup>central subfield thickness missing or not gradable in 2, 2, 3 completers and 1, 0, 0 non-completers in aflibercept, bevacizumab, and ranibizumab, respectively.

<sup>‡</sup>Volume missing or not gradable in 36, 31, 30 completers and 4, 4, 6 non-completers in aflibercept, bevacizumab, and ranibizumab, respectively.



**Table S2. Visits and Treatment for Diabetic Macular Edema Overall**

|                                                         | <b>Aflibercept</b> | <b>Bevacizumab</b> | <b>Ranibizumab</b> | <b>P-value</b> |
|---------------------------------------------------------|--------------------|--------------------|--------------------|----------------|
| <b>Visits</b>                                           |                    |                    |                    |                |
| <b>Second Year – 2 year completers only</b>             |                    |                    |                    |                |
| <b>Number of Visits from 1 Year to 2 Year</b>           | <b>N=201</b>       | <b>N=185</b>       | <b>N=192</b>       |                |
| 1                                                       | 0                  | 0                  | 1 (1%)             |                |
| 2                                                       | 1 (1%)             | 0                  | 0                  |                |
| 3                                                       | 1 (1%)             | 4 (2%)             | 2 (1%)             |                |
| 4                                                       | 15 (7%)            | 16 (9%)            | 13 (7%)            |                |
| 5                                                       | 11 (5%)            | 8 (4%)             | 7 (4%)             |                |
| 6                                                       | 9 (4%)             | 8 (4%)             | 14 (7%)            |                |
| 7                                                       | 11 (5%)            | 17 (9%)            | 16 (8%)            |                |
| 8                                                       | 20 (10%)           | 15 (8%)            | 19 (10%)           |                |
| 9                                                       | 22 (11%)           | 19 (10%)           | 21 (11%)           |                |
| 10                                                      | 24 (12%)           | 12 (6%)            | 18 (9%)            |                |
| 11                                                      | 32 (16%)           | 32 (17%)           | 20 (10%)           |                |
| 12                                                      | 31 (15%)           | 34 (18%)           | 38 (20%)           |                |
| >=13                                                    | 24 (12%)           | 20 (11%)           | 23 (12%)           |                |
| Mean (Standard Deviation)                               | 9.4 (2.9)          | 9.3 (3.0)          | 9.3 (2.9)          |                |
| Median (25 <sup>th</sup> , 75 <sup>th</sup> percentile) | 10 (8, 12)         | 10 (7, 12)         | 10 (7, 12)         |                |
| <b>Injections</b>                                       |                    |                    |                    |                |
| <b>Second Year – 2 year completers only</b>             |                    |                    |                    |                |
| <b>Number of Injections from 1 Year to 2 Year</b>       | <b>N=201</b>       | <b>N=185</b>       | <b>N=192**</b>     |                |
| 0                                                       | 32 (16%)           | 30 (16%)           | 29 (15%)           |                |
| 1                                                       | 11 (5%)            | 11 (6%)            | 16 (8%)            |                |
| 2                                                       | 9 (4%)             | 14 (8%)            | 11 (6%)            |                |
| 3                                                       | 23 (11%)           | 8 (4%)             | 11 (6%)            |                |
| 4                                                       | 12 (6%)            | 13 (7%)            | 18 (9%)            |                |
| 5                                                       | 21 (10%)           | 16 (9%)            | 11 (6%)            |                |
| 6                                                       | 20 (10%)           | 12 (6%)            | 9 (5%)             |                |
| 7                                                       | 24 (12%)           | 14 (8%)            | 18 (9%)            |                |
| 8                                                       | 15 (7%)            | 18 (10%)           | 20 (10%)           |                |
| 9                                                       | 13 (6%)            | 18 (10%)           | 15 (8%)            |                |
| 10                                                      | 13 (6%)            | 13 (7%)            | 19 (10%)           |                |
| 11                                                      | 7 (3%)             | 9 (5%)             | 8 (4%)             |                |
| 12                                                      | 0                  | 5 (3%)             | 6 (3%)             |                |
| >=13                                                    | 1 (1%)             | 4 (2%)             | 1 (1%)             |                |
| Mean (Standard Deviation)                               | 5.0 (3.4)          | 5.5 (3.9)          | 5.4 (3.8)          |                |
| Median (25 <sup>th</sup> , 75 <sup>th</sup> percentile) | 5 (2, 7)           | 6 (2, 9)           | 6 (2, 9)           | 0.32*          |
| <b>Cumulative over 2 years– 2 year completers only</b>  |                    |                    |                    |                |
| <b>Number of Injections Prior to 2 Year</b>             | <b>N=201</b>       | <b>N=185</b>       | <b>N=192**,‡‡</b>  |                |
| Mean (Standard Deviation)                               | 14.2 (4.6)         | 15.3 (5.3)         | 14.8 (5.0)         |                |
| Median (25 <sup>th</sup> , 75 <sup>th</sup> percentile) | 15 (11, 17)        | 16 (12, 20)        | 15 (11, 19)        | 0.08*          |

|                                                                                                     | Aflibercept         | Bevacizumab          | Ranibizumab             | P-value |
|-----------------------------------------------------------------------------------------------------|---------------------|----------------------|-------------------------|---------|
| <b>All visits, prior to 2 year – all available</b>                                                  |                     |                      |                         |         |
| <b>Visits prior to 2 year where injection need was assessed</b>                                     | <b>N = 4561</b>     | <b>N = 4382</b>      | <b>N = 4399</b>         |         |
| Number of Visits with injections received                                                           | 2998 (66%)          | 3115 (71%)           | 3066 (70%)              |         |
| Number of Visits with injections deferred due to                                                    |                     |                      |                         |         |
| success                                                                                             | 141 (3%)            | 46 (1%)              | 127 (3%)                |         |
| stability                                                                                           | 1303 (29%)          | 1134 (26%)           | 1121 (25%)              |         |
| failure                                                                                             | 9 (<1%)             | 24 (1%)              | 3 (<1%)                 |         |
| other reasons                                                                                       | 110 (2%)            | 63 (1%)              | 82 (2%)                 |         |
| <b>Follow-up Visits Requiring Re-Injection Per Protocol based on OCT and visual acuity criteria</b> | <b>N = 2844</b>     | <b>N = 2915</b>      | <b>N = 2901</b>         |         |
| Injection Not Given                                                                                 | 74 (3%)             | 40 (1%)              | 60 (2%)                 |         |
| <b>Number of Injections Received when Protocol Indicated Deferral</b>                               | <b>1</b>            | <b>17</b>            | <b>5</b>                |         |
| <b>Laser</b>                                                                                        |                     |                      |                         |         |
| <b>Second Year– 2 year completers only</b>                                                          |                     |                      |                         |         |
|                                                                                                     | <b>N=201</b>        | <b>N=185</b>         | <b>N=192</b>            |         |
| <b>Total Number of Laser Treatments between 1 Year and 2 Years</b>                                  |                     |                      |                         |         |
| 0                                                                                                   | 160 (80%)           | 127 (69%)            | 140 (73%)               | 0.046†  |
| 1                                                                                                   | 31 (15%)            | 42 (23%)             | 27 (14%)                |         |
| 2                                                                                                   | 8 (4%)              | 12 (6%)              | 17 (9%)                 |         |
| 3                                                                                                   | 2 (1%)              | 4 (2%)               | 8 (4%)                  |         |
| Mean (Standard Deviation)                                                                           | 0.3 (0.6)           | 0.4 (0.7)            | 0.4 (0.8)               |         |
| Median (25 <sup>th</sup> , 75 <sup>th</sup> percentile)                                             | 0 (0,0)             | 0 (0,1)              | 0 (0,1)                 |         |
| <b>Cumulative during 2 years– 2 year completers only</b>                                            |                     |                      |                         |         |
|                                                                                                     | <b>N=201</b>        | <b>N=185</b>         | <b>N=192</b>            |         |
| <b>Total Number of Laser Treatments Between 24 weeks and 2 Years</b>                                |                     |                      |                         |         |
| 0                                                                                                   | 118 (59%)           | 66 (36%)             | 93 (48%)                | <0.001‡ |
| 1                                                                                                   | 46 (23%)            | 60 (32%)             | 48 (25%)                |         |
| 2                                                                                                   | 21 (10%)            | 35 (19%)             | 26 (14%)                |         |
| 3                                                                                                   | 10 (5%)             | 18 (10%)             | 15 (8%)                 |         |
| 4-5                                                                                                 | 6 (3%)              | 6 (3%)               | 10 (5%)                 |         |
| Mean (Standard Deviation)                                                                           | 0.7 (1.1)           | 1.1 (1.1)            | 1.0 (1.2)               |         |
| Median (25 <sup>th</sup> , 75 <sup>th</sup> percentile)                                             | 0 (0,1)             | 1 (0, 2)             | 1 (0,2)                 |         |
| <b>Non-Protocol Treatments for DME</b>                                                              |                     |                      |                         |         |
| <b>Cumulative over 2 years– all randomized eyes</b>                                                 |                     |                      |                         |         |
|                                                                                                     | <b>N=224</b>        | <b>N=218</b>         | <b>N=218</b>            |         |
| <b>Eyes receiving 1 or more alternative treatments for DME other than laser – N (%)</b>             | <b>3 (1%) / (1)</b> | <b>10 (5%) / (6)</b> | <b>1 (&lt;1%) / (0)</b> |         |

|                                                           | Aflibercept | Bevacizumab | Ranibizumab | P-value |
|-----------------------------------------------------------|-------------|-------------|-------------|---------|
| <b>/ (Number of those eyes meeting failure criteria )</b> |             |             |             |         |
| <b>Alternative treatment(s) received</b>                  |             |             |             |         |
| Aflibercept                                               | 0           | 2           | 0           |         |
| Aflibercept/Corticosteroid                                | 0           | 1           | 0           |         |
| Aflibercept/Ranibizumab                                   | 0           | 1           | 0           |         |
| Aflibercept/Corticosteroid/Ranibizumab                    | 0           | 1           | 0           |         |
| Corticosteroid/Ranibizumab                                | 0           | 1           | 0           |         |
| Bevacizumab                                               | 0           | 0           | 1           |         |
| Ranibizumab                                               | 1           | 3           | 0           |         |
| Corticosteroid                                            | 2           | 1           | 0           |         |

DME = Diabetic macular edema

\* Global (overall 3 group comparison) P-value from Kruskal-Wallis Test for number of injections in the given time interval.

†Global (overall 3 group comparison) P-value from Fisher’s Test for proportion with no laser versus any laser in the given time interval. Pairwise comparisons from Fisher’s Exact Test (adjusted for multiple comparisons by taking the maximum of the global and pairwise comparison P-values): aflibercept-bevacizumab: P=0.046, aflibercept-ranibizumab: P=0.12, bevacizumab-ranibizumab: P=0.37.

‡Global (overall 3 group comparison) P-value from Fisher’s Test for proportion with no laser versus any laser in the given time interval. Pairwise comparisons from Fisher’s Exact Test (adjusted for multiple comparisons by taking the maximum of the global and pairwise comparison P-values): aflibercept-bevacizumab: P=<0.001, aflibercept-ranibizumab: P=0.04, bevacizumab-ranibizumab: P=0.01.

\*\*1 ranibizumab eye had 3 injections of commercial ranibizumab (not through the study). These injections are not counted in the injection counts, and 2 of these are counted as injections required but not given via the protocol system.

‡‡Seven ranibizumab eyes received 1 injection and 2 ranibizumab eyes received 2 injections of 0.5 mg of ranibizumab prior to the FDA approving a 0.3mg dosage of ranibizumab for DME treatment.

Success: before the 24-week visit, visual acuity letter score was  $\geq 84$  (20/20 or better) with CST <250 microns Stratus equivalent and no “improvement” (at least a 5 letter gain or at least a 10% reduction in CST) from the last two injections.

Stability: starting at the 24-week visit, no “improvement” and no “worsening” (at least a 5-letter change or 10% change in CST) after two consecutive injections

Failure: starting at the 24-week visit, OCT CST  $\geq$  250 microns Stratus equivalent, visual acuity 10 or more letters worse than baseline at 2 consecutive visits, DME present on clinical exam that the investigator believes is the cause of the visual loss, complete laser has been given, not “improved” (OCT CST decreased by <10% [or increased] AND visual acuity letter score improved by <5 letters) since either of the last two injections, not “improved” (OCT CST decreased by <10% [or increased] AND visual acuity letter score improved by <5 letters) since the last laser treatment was given, AND  $\geq$  13 weeks since the last laser treatment.

**Table S3. Visual Acuity at 2 Years – Overall**

|                                            | Observed Data            |                          |                          | Treatment Group Comparisons<br>Differences in Mean Change or Difference in Proportions<br>Adjusted 95% CI and Adjusted P Value |                                  |                                  |
|--------------------------------------------|--------------------------|--------------------------|--------------------------|--------------------------------------------------------------------------------------------------------------------------------|----------------------------------|----------------------------------|
|                                            | Aflibercept<br>(N = 201) | Bevacizumab<br>(N = 185) | Ranibizumab<br>(N = 191) | Aflibercept vs<br>Becavizumab                                                                                                  | Aflibercept vs<br>Ranibizumab    | Ranibizumab vs<br>Becavizumab    |
| <b>Baseline</b>                            |                          |                          |                          |                                                                                                                                |                                  |                                  |
| Mean ± SD                                  | 64.9 ± 11.9              | 65.0 ± 11.1              | 64.9 ± 11.4              |                                                                                                                                |                                  |                                  |
| ~ Snellen equivalent                       | 20/50                    | 20/50                    | 20/50                    |                                                                                                                                |                                  |                                  |
| <b>1 Year (in 2 year cohort*)</b>          |                          |                          |                          |                                                                                                                                |                                  |                                  |
| Mean ± SD                                  | 78.4 ± 9.8               | 74.7 ± 12.4              | 76.4 ± 11.2              |                                                                                                                                |                                  |                                  |
| ~ Snellen equivalent                       | 20/32                    | 20/32                    | 20/32                    |                                                                                                                                |                                  |                                  |
| Mean Change ±SD                            | 13.5 ± 11.1              | 10.0 ± 10.1              | 11.5 ± 9.2               |                                                                                                                                |                                  |                                  |
| <b>2 Year</b>                              |                          |                          |                          |                                                                                                                                |                                  |                                  |
| Mean ± SD                                  | 77.8 ± 11.5              | 74.6 ± 14.5              | 77.1 ± 12.4              |                                                                                                                                |                                  |                                  |
| ~ Snellen equivalent                       | 20/32                    | 20/32                    | 20/32                    |                                                                                                                                |                                  |                                  |
| <b>Change from baseline (letter score)</b> |                          |                          |                          |                                                                                                                                |                                  |                                  |
| Mean ± SD                                  | +12.8 ± 12.4             | +10.0 ± 11.8             | +12.3 ± 10.5             | +2.7<br>(+0.3 to +5.2)<br>P=0.02                                                                                               | +0.7<br>(-1.3 to +2.8)<br>P=0.47 | +2.0<br>(-0.4 to +4.4)<br>P=0.11 |
| ≥ 10 letter improvement                    | 125 (62%)                | 99 (54%)                 | 112 (59%)                | +9%<br>(-3% to +20%)<br>P=0.22                                                                                                 | +3%<br>(-6% to +12%)<br>P=0.51   | +6%<br>(-5% to +17%)<br>P=0.50   |
| ≥ 10 letters worsening                     | 9 (4%)                   | 12 (6%)                  | 3 (2%)                   | -1%<br>(-6% to +3%)<br>P=0.49                                                                                                  | +2%<br>(-2% to +6%)<br>P=0.39    | -4%<br>(-8% to +1%)<br>P=0.15    |
| ≥ 15 letter improvement                    | 78 (39%)                 | 64 (35%)                 | 70 (37%)                 | +4%<br>(-5% to +13%)<br>P=0.70                                                                                                 | +2%<br>(-7% to +10%)<br>P=0.70   | +2%<br>(-6% to +11%)<br>P=0.70   |
| ≥ 15 letters worsening                     | 5 (2%)                   | 6 (3%)                   | 3 (2%)                   | 0%<br>(-3% to +3%)<br>P=0.84                                                                                                   | +1%<br>(-2% to +4%)<br>P=0.84    | -1%<br>(-4% to +2%)<br>P=0.84    |

SD = Standard deviation, CI = Confidence interval

Treatment group comparisons are from ANCOVA models adjusted for continuous baseline visual acuity or from binomial regression models adjusted for categorical baseline visual acuity. Reported P-values have been adjusted for multiple treatment group comparisons to account for an overall Type 1 error rate of 0.049 (see Hochberg for computation of the Hochberg-adjusted P-values<sup>2</sup>) and corresponding  $(1-\alpha/i)*100\%$  confidence intervals were reported, where i is the rank (1, 2, or 3) of the Hochberg-adjusted P-value from among the descending ordered raw pairwise P-values. This could result in identical P-values for all three pairwise comparisons.

Tests for treatment group interaction with baseline visual acuity from ANCOVA model for mean change in visual acuity adjusted for baseline visual acuity (using the multiple imputation datasets and computing the P-value associated with the average of the F statistics from each imputed dataset):

- **P-value for interaction, treating baseline visual acuity as continuous = 0.02**
- **P-value for interaction, treating baseline visual acuity as categorical (<69 versus  $\geq$ 69) = 0.11**

Visual acuity change truncated using 1 year mean +/- 3SD (-22 and +44) to minimize the effects of outliers for 6 eyes in the aflibercept group (3 on the positive end, 3 on the negative end), 5 eyes in the bevacizumab group (1 on the positive end, 4 on the negative end), and 4 eyes in the ranibizumab group (1 on the positive end, 3 on the negative end).

2-year visit data unavailable for 23 eyes in the aflibercept group, 33 eyes in the bevacizumab group, and 27 eyes (including one eye which had a 2 year visit but was missing visual acuity at the visit) in the ranibizumab group. Descriptive statistics were based on observed data; Markov chain Monte Carlo multiple imputation<sup>3</sup> (100 imputations) was used to estimate the missing 2 year change in visual acuity for the treatment group comparisons (including tests for interaction).

\*One eye in the aflibercept group in the 2 year cohort was missing 1 year.

| <b>Table S4. Visual Acuity at 2 Year: Sensitivity Analysis</b>                                                                                        |                                              |                                      |                                      |                                                                 |
|-------------------------------------------------------------------------------------------------------------------------------------------------------|----------------------------------------------|--------------------------------------|--------------------------------------|-----------------------------------------------------------------|
| Primary analyses are indicated in bold                                                                                                                | Mean Change in Visual Acuity at 2 Years ± SD |                                      |                                      | Hochberg-adjusted <sup>2</sup><br>P-values for<br>AvB, AvR, BvR |
|                                                                                                                                                       | Aflibercept                                  | Bevacizumab                          | Ranibizumab                          |                                                                 |
| <b>Overall</b>                                                                                                                                        | Ns<br>Observed=201<br>Imputation=224         | Ns<br>Observed=185<br>Imputation=218 | Ns<br>Observed=191<br>Imputation=218 |                                                                 |
| Observed data only, VA Change Not Truncated                                                                                                           | +12.9 ± 13.2                                 | +9.6 ± 13.9                          | +12.2 ± 11.2                         | 0.02, 0.51, 0.07                                                |
| Observed data only                                                                                                                                    | <b>+12.8 ± 12.4</b>                          | <b>+10.0 ± 11.8</b>                  | <b>+12.3 ± 10.5</b>                  | 0.03, 0.62, 0.07                                                |
| LOCF Imputation, VA Change Not Truncated                                                                                                              | +12.3 ± 13.0                                 | +9.2 ± 13.3                          | +11.3 ± 11.8                         | 0.02, 0.29, 0.17                                                |
| LOCF Imputation                                                                                                                                       | +12.2 ± 12.3                                 | +9.6 ± 11.4                          | +11.5 ± 11.1                         | 0.03, 0.38, 0.17                                                |
| Multiple Imputation, VA Change Not Truncated                                                                                                          | +12.6 ± 13.5                                 | +9.3 ± 14.2                          | +11.8 ± 12.1                         | 0.01, 0.37, 0.11                                                |
| Multiple Imputation                                                                                                                                   | +12.5 ± 12.7                                 | +9.8 ± 12.0                          | +12.0 ± 11.2                         | <b>0.02, 0.47, 0.11</b>                                         |
| Multiple Imputation, adjusting for potential confounders*                                                                                             |                                              |                                      |                                      | 0.06, 0.53, 0.17                                                |
| Observed data only; converting visual acuity change scores to normalized ranks (van der Waerden scores)                                               |                                              |                                      |                                      | 0.02, 0.56, 0.06                                                |
| Observed data only; Wilcoxon rank sum test                                                                                                            |                                              |                                      |                                      | 0.15, 0.60, 0.23                                                |
| Observed data only; per-protocol analysis excluding any eye receiving any alternative treatment for DME †                                             |                                              |                                      |                                      | 0.17, 0.51, 0.43                                                |
| Observed data only; per-protocol analysis excluding any eye receiving any alternative treatment for DME or for which an injection deviation occurred‡ |                                              |                                      |                                      | 0.07, 0.78, 0.09                                                |
| <b>Baseline Visual Acuity 20/50 or Worse (Letter Score &lt;69)</b>                                                                                    | Ns<br>Observed=98<br>Imputation=112          | Ns<br>Observed=92<br>Imputation=107  | Ns<br>Observed=94<br>Imputation=110  |                                                                 |
| Observed data only, VA Change Not Truncated                                                                                                           | +18.5 ± 14.7                                 | +12.9 ± 15.4                         | +15.8 ± 13.3                         | 0.03, 0.20, 0.20                                                |
| Observed data only                                                                                                                                    | <b>+18.1 ± 13.8</b>                          | <b>+13.3 ± 13.4</b>                  | <b>+16.1 ± 12.1</b>                  | 0.048, 0.29, 0.29                                               |
| LOCF Imputation, VA Change Not Truncated                                                                                                              | +17.2 ± 14.7                                 | +12.0 ± 15.0                         | +14.3 ± 14.5                         | 0.02, 0.18, 0.32                                                |
| LOCF Imputation                                                                                                                                       | +16.9 ± 13.9                                 | +12.4 ± 13.2                         | +14.7 ± 13.1                         | 0.03, 0.26, 0.26                                                |
| Multiple Imputation, VA Change Not Truncated                                                                                                          | +17.7 ± 14.9                                 | +12.2 ± 15.5                         | +15.1 ± 14.2                         | 0.01, 0.20, 0.20                                                |
| Multiple Imputation                                                                                                                                   | +17.5 ± 14.0                                 | +12.7 ± 13.6                         | +15.4 ± 12.9                         | <b>0.02, 0.18, 0.18</b>                                         |

|                                                                                                                                                       |                       |                       |                       |                         |
|-------------------------------------------------------------------------------------------------------------------------------------------------------|-----------------------|-----------------------|-----------------------|-------------------------|
| Multiple Imputation, adjusting for potential confounders*                                                                                             |                       |                       |                       | 0.08, 0.33, 0.33        |
| Observed data only; converting visual acuity change scores to normalized ranks (van der Waerden scores)                                               |                       |                       |                       | 0.06, 0.27, 0.27        |
| Observed data only; Wilcoxon rank sum test                                                                                                            |                       |                       |                       | 0.07, 0.24, 0.24        |
| Observed data only; per-protocol analysis excluding any eye receiving any alternative treatment for DME †                                             |                       |                       |                       | 0.29, 0.47, 0.61        |
| Observed data only; per-protocol analysis excluding any eye receiving any alternative treatment for DME or for which an injection deviation occurred‡ |                       |                       |                       | 0.12, 0.55, 0.30        |
| <b>Baseline Visual Acuity 20/32-20/40 (Letter Score &gt;= 69)</b>                                                                                     | <b>Ns</b>             | <b>Ns</b>             | <b>Ns</b>             |                         |
|                                                                                                                                                       | <b>Observed=103</b>   | <b>Observed=93</b>    | <b>Observed=97</b>    |                         |
|                                                                                                                                                       | <b>Imputation=112</b> | <b>Imputation=111</b> | <b>Imputation=108</b> |                         |
| Observed data only, VA Change Not Truncated                                                                                                           | +7.7 ± 8.9            | +6.3 ± 11.5           | +8.6 ± 7.0            | 0.32, 0.49, 0.12        |
| Observed data only                                                                                                                                    | <b>+7.8 ± 8.4</b>     | <b>+6.8 ± 8.8</b>     | <b>+8.6 ± 7.0</b>     | 0.36, 0.49, 0.14        |
| LOCF Imputation, VA Change Not Truncated                                                                                                              | +7.3 ± 8.8            | +6.5 ± 10.9           | +8.3 ± 7.3            | 0.47, 0.50, 0.19        |
| LOCF Imputation                                                                                                                                       | +7.5 ± 8.3            | +6.9 ± 8.6            | +8.3 ± 7.3            | 0.51, 0.51, 0.24        |
| Multiple Imputation, VA Change Not Truncated                                                                                                          | +7.4 ± 9.5            | +6.5 ± 12.0           | +8.4 ± 8.2            | 0.52, 0.52, 0.26        |
| Multiple Imputation                                                                                                                                   | +7.6 ± 8.8            | +7.1 ± 9.6            | +8.4 ± 7.8            | <b>0.51, 0.51, 0.31</b> |
| Multiple Imputation, adjusting for potential confounders*                                                                                             |                       |                       |                       | 0.48, 0.68, 0.38        |
| Observed data only; converting visual acuity change scores to normalized ranks (van der Waerden scores)                                               |                       |                       |                       | 0.32, 0.56, 0.15        |
| Observed data only; Wilcoxon rank sum test                                                                                                            |                       |                       |                       | 0.60, 0.73, 0.42        |
| Observed data only; per-protocol analysis excluding any eye receiving any alternative treatment for DME †                                             |                       |                       |                       | 0.45, 0.59, 0.25        |
| Observed data only; per-protocol analysis excluding any eye receiving any alternative treatment for DME or for which an injection deviation occurred‡ |                       |                       |                       | 0.45, 0.74, 0.36        |

VA change truncated unless otherwise stated. Treatment group comparisons of mean change are from ANCOVA models adjusting for continuous baseline visual acuity unless otherwise stated. VA = Visual acuity; LOCF=Last observation carried forward; DME = Diabetic macular edema.

\*Any prior DME treatment, age, baseline central subfield thickness, diabetes type, baseline lens status, and baseline Hemoglobin A1c

†Overall: 2 in the aflibercept group, 9 in the bevacizumab group, and 0 in the ranibizumab group.

‡ Overall: 42 in the aflibercept group, 35 in the bevacizumab group, and 33 in the ranibizumab group.

Multiple imputation = Markov chain Monte Carlo multiple imputation<sup>3</sup> (100 imputations) was used to estimate the missing 2 year change in visual acuity for the treatment group comparisons

**Table S5. Detailed Distribution of Visual Acuity at 2 Years According to Baseline Visual Acuity Subgroup**

| <i>Baseline Visual Acuity 20/50 or Worse (Letter Score &lt;69)</i> |                          |                         |                         |
|--------------------------------------------------------------------|--------------------------|-------------------------|-------------------------|
|                                                                    | Aflibercept<br>(N = 98)  | Bevacizumab<br>(N = 92) | Ranibizumab<br>(N = 94) |
| ~Snellen Equivalent (Letter Score)                                 |                          |                         |                         |
| 20/12.5 (94-98)                                                    | 0                        | 0                       | 2(2%)                   |
| 20/16 (89-93)                                                      | 7 (7%)                   | 2 (2%)                  | 6 (6%)                  |
| 20/20 (84-88)                                                      | 16 (16%)                 | 9 (10%)                 | 12 (13%)                |
| 20/25 (79-83)                                                      | 21 (21%)                 | 19 (21%)                | 9 (10%)                 |
| 20/32 (74-78)                                                      | 16 (16%)                 | 13 (14%)                | 22 (23%)                |
| 20/40 (69-73)                                                      | 15 (15%)                 | 20 (22%)                | 12 (13%)                |
| 20/50 (64-68)                                                      | 10 (10%)                 | 8 (9%)                  | 9 (10%)                 |
| 20/63 (59-63)                                                      | 4 (4%)                   | 5 (5%)                  | 7 (7%)                  |
| 20/80 (54-58)                                                      | 2 (2%)                   | 5 (5%)                  | 6 (6%)                  |
| 20/100 (49-53)                                                     | 1 (1%)                   | 2 (2%)                  | 6 (6%)                  |
| 20/125 (44-48)                                                     | 2 (2%)                   | 3 (3%)                  | 1 (1%)                  |
| 20/160 (39-43)                                                     | 1 (1%)                   | 1 (1%)                  | 0                       |
| 20/200 (34-38)                                                     | 0                        | 3 (3%)                  | 0                       |
| 20/250 (29-33)                                                     | 1 (1%)                   | 0                       | 0                       |
| 20/320 (24-28)                                                     | 2 (2%)                   | 0                       | 1 (1%)                  |
| 20/400 (19-23)                                                     | 0                        | 0                       | 0                       |
| <20/400 (<19)                                                      | 0                        | 2 (2%)                  | 1 (1%)                  |
| <i>Baseline Visual Acuity 20/32-20/40 (Letter Score 78- 69)</i>    |                          |                         |                         |
|                                                                    | Aflibercept<br>(N = 103) | Bevacizumab<br>(N = 93) | Ranibizumab<br>(N = 97) |
| ~Snellen Equivalent (Letter Score)                                 |                          |                         |                         |
| 20/12.5 (94-98)                                                    | 1 (1%)                   | 3 (3%)                  | 2 (2%)                  |
| 20/16 (89-93)                                                      | 14 (14%)                 | 11 (12%)                | 12 (12%)                |
| 20/20 (84-88)                                                      | 33 (32%)                 | 16 (17%)                | 29 (30%)                |
| 20/25 (79-83)                                                      | 25 (24%)                 | 23 (25%)                | 29 (30%)                |
| 20/32 (74-78)                                                      | 12 (12%)                 | 25 (27%)                | 15 (15%)                |
| 20/40 (69-73)                                                      | 12 (12%)                 | 9 (10%)                 | 7 (7%)                  |
| 20/50 (64-68)                                                      | 1 (1%)                   | 2 (2%)                  | 2 (2%)                  |
| 20/63 (59-63)                                                      | 4 (4%)                   | 2 (2%)                  | 0                       |
| 20/80 (54-58)                                                      | 0                        | 0                       | 0                       |
| 20/100 (49-53)                                                     | 0                        | 1 (1%)                  | 1 (1%)                  |
| 20/125 (44-48)                                                     | 0                        | 0                       | 0                       |
| 20/160 (39-43)                                                     | 0                        | 0                       | 0                       |
| 20/200 (34-38)                                                     | 1 (1%)                   | 0                       | 0                       |
| 20/250 (29-33)                                                     | 0                        | 0                       | 0                       |
| 20/320 (24-28)                                                     | 0                        | 0                       | 0                       |
| 20/400 (19-23)                                                     | 0                        | 0                       | 0                       |
| <20/400 (<19)                                                      | 0                        | 1 (1%)                  | 0                       |



| <b>Table S6 Change in Visual Acuity Letter Score from Baseline to 2 Year: Additional Pre-Planned Subgroup Analyses</b> |                    |                  |                    |                  |                    |                  |                                                         |
|------------------------------------------------------------------------------------------------------------------------|--------------------|------------------|--------------------|------------------|--------------------|------------------|---------------------------------------------------------|
|                                                                                                                        | <b>Aflibercept</b> |                  | <b>Bevacizumab</b> |                  | <b>Ranibizumab</b> |                  | <b>P Value for Interaction Categorical (Continuous)</b> |
|                                                                                                                        | <b>N</b>           | <b>Mean ± SD</b> | <b>N</b>           | <b>Mean ± SD</b> | <b>N</b>           | <b>Mean ± SD</b> |                                                         |
| <b>Baseline OCT Central Subfield Thickness</b>                                                                         |                    |                  |                    |                  |                    |                  | 0.68<br>(0.23)                                          |
| < 400 µm                                                                                                               | 110                | 10.9±11.3        | 101                | 8.4±10.2         | 104                | 11.8±10.5        |                                                         |
| ≥ 400 µm                                                                                                               | 89                 | 15.0±13.3        | 82                 | 11.5±12.9        | 84                 | 13.0±10.5        |                                                         |
| <b>Any Prior Anti-VEGF Treatment</b>                                                                                   |                    |                  |                    |                  |                    |                  | 0.45                                                    |
| No                                                                                                                     | 179                | 13.0±12.9        | 153                | 10.6±11.4        | 167                | 12.7±10.6        |                                                         |
| Yes                                                                                                                    | 22                 | 11.4±8.3         | 32                 | 7.6±13.1         | 24                 | 9.7±9.2          |                                                         |
| <b>Lens Status</b>                                                                                                     |                    |                  |                    |                  |                    |                  | 0.69                                                    |
| Pseudophakic                                                                                                           | 51                 | 12.8±11.1        | 49                 | 8.2±11.7         | 40                 | 11.5±8.2         |                                                         |
| Phakic                                                                                                                 | 150                | 12.9±12.9        | 136                | 10.7±11.8        | 151                | 12.5±11.0        |                                                         |

SD = standard deviation, OCT= optical coherence tomography, VEGF= vascular endothelial growth factor

Visual acuity change truncated to +/- 3SD.

An additional preplanned hypothesis to look at prior vitrectomy subgroups did not have at least 10 eyes in each treatment group for each subgroup and was therefore not evaluated.

Descriptive statistics were based on observed data; Markov chain Monte Carlo multiple imputation<sup>3</sup> (100 imputations) was used to estimate the missing 2 year change in visual acuity for the tests for interaction. Tests for treatment group interaction were from ANCOVA model for mean change in visual acuity adjusted for continuous baseline visual acuity (using the multiple imputation datasets and computing the *P*-value associated with the average of the F statistics from each imputed dataset).

**Table S7. Optical Coherence Tomography Central Subfield Thickness Outcomes Overall**

|                                   | Observed Data            |                          |                          | Treatment Group Comparisons<br>Differences in Mean Change or Difference in Proportions<br>Adjusted 95% CI and Adjusted P Value |                                 |                                   |
|-----------------------------------|--------------------------|--------------------------|--------------------------|--------------------------------------------------------------------------------------------------------------------------------|---------------------------------|-----------------------------------|
|                                   | Aflibercept<br>(N = 198) | Bevacizumab<br>(N = 182) | Ranibizumab<br>(N = 186) | Aflibercept vs<br>Beveracizumab                                                                                                | Aflibercept vs<br>Ranibizumab   | Ranibizumab vs<br>Beveracizumab   |
| <b>Baseline CSF</b>               |                          |                          |                          |                                                                                                                                |                                 |                                   |
| Mean ± SD                         | 411 ± 131                | 415 ± 134                | 403 ± 120                |                                                                                                                                |                                 |                                   |
| <b>1 year (in 2 year cohort*)</b> |                          |                          |                          |                                                                                                                                |                                 |                                   |
| Mean ± SD                         | 239± 66                  | 310 ±121                 | 254 ±89                  |                                                                                                                                |                                 |                                   |
| Mean change ± SD                  | -169 ± 139               | -102 ± 124               | -147 ± 134               |                                                                                                                                |                                 |                                   |
| <b>2 year</b>                     |                          |                          |                          |                                                                                                                                |                                 |                                   |
| Mean ± SD                         | 237± 68                  | 286 ±102                 | 251 ±99                  |                                                                                                                                |                                 |                                   |
| Mean change ± SD                  | -171 ± 141               | -126 ± 143               | -149 ± 141               | -48.5<br>(-70.0,-27.0)<br>P<0.001                                                                                              | -15.5<br>(-33.0,+2.0)<br>P=0.08 | -33.0<br>(-53.4,-12.6)<br>P<0.001 |
| CSF <250 µm                       | 141 (71%)                | 75 (41%)                 | 121 (65%)                | +32%<br>(+20%, +43%)<br>P<0.001                                                                                                | +6%<br>(-3%, +16%)<br>P=0.20    | +25%<br>(+14%, +37%)<br>P<0.001   |

CSF = central subfield, CI = confidence interval, SD = standard deviation

In addition to participants missing the 2-year visit (see Figure S1), 3 in the aflibercept group, 3 in the bevacizumab group, and 6 in the ranibizumab group had 2-year visits but unusable OCT data to compute change due to the scan being missing or ungradable at either baseline or 2 year.

Baseline CSF values were converted from the thickness value measured on a Spectralis or Cirrus OCT machine to a Stratus equivalent value for 540 scans. 2-year CSF values were converted from a thickness value measured on a Spectralis or Cirrus OCT machine to a Stratus equivalent value for 563 scans. When calculating change in CSF thickness, measurements taken on the same machine at both visits were not converted, since the conversion equation slope is nearly 1 and the constant difference does not affect the change calculation. Therefore, change in CSF thickness was calculated after converting either the baseline and/or follow-up thickness value from Spectralis or Cirrus to a Stratus equivalent value in 34 eyes.

Treatment group comparison results are from ANCOVA on observed data, adjusted for continuous baseline visual acuity and continuous baseline CSF or from Poisson regression models with robust variance estimation using identity link<sup>4</sup>, adjusted for categorical baseline visual acuity and categorical baseline CSF. Reported P-values have been adjusted for multiple treatment group comparisons to account for an overall Type 1 error rate of 0.049 (see Hochberg for computation of the Hochberg-adjusted P-values<sup>2</sup>) and corresponding (1-α/i)\*100% confidence intervals were reported, where i is the rank (1, 2, or 3) of the Hochberg-adjusted P-value from among the descending ordered raw pairwise P-values. This could result in identical P-values for all three pairwise comparisons.

Tests for treatment group interaction with baseline visual acuity from ANCOVA model for mean change in CSF adjusted for baseline visual acuity and continuous baseline CSF:

- **P-value for interaction, treating baseline visual acuity as continuous <0.001.**
- **P-value for interaction, treating baseline visual acuity as categorical (<69 versus ≥69) <0.001.**

\*2 in the aflibercept group, 1 in the bevacizumab group, and 2 in the ranibizumab group were in the 2 year cohort but missing 1 year.

**Table S8. Change in Retinal Volume from Baseline to 2 Year****Overall**

|                                                   | <b>Aflibercept<br/>(N = 163)</b> | <b>Bevacizumab<br/>(N = 153)</b> | <b>Ranibizumab<br/>(N = 159)</b> |
|---------------------------------------------------|----------------------------------|----------------------------------|----------------------------------|
| <b>Baseline Volume - Mean ± SD</b>                | 8.9±1.8                          | 8.9±2.0                          | 9.0±1.8                          |
| <b>Volume at 2 Year - Mean ± SD</b>               | 7.2±0.9                          | 7.5±1.1                          | 7.3±1.2                          |
| <b>Change in Volume from Baseline - Mean ± SD</b> | -1.8±1.7                         | -1.4±1.8                         | -1.7±1.7                         |

**Baseline Visual Acuity 20/50 or Worse (Letter Score <69)**

|                                                   | <b>Aflibercept<br/>(N = 78)</b> | <b>Bevacizumab<br/>(N = 71)</b> | <b>Ranibizumab<br/>(N = 73)</b> |
|---------------------------------------------------|---------------------------------|---------------------------------|---------------------------------|
| <b>Baseline Volume - Mean ± SD</b>                | 9.6±2.1                         | 9.6±2.4                         | 9.4±2.2                         |
| <b>Volume at 2 Year - Mean ± SD</b>               | 7.2±1.1                         | 7.5±1.0                         | 7.3±1.5                         |
| <b>Change in Volume from Baseline - Mean ± SD</b> | -2.3±1.8                        | -2.1±2.0                        | -2.1±2.0                        |

**Baseline Visual Acuity 20/32-20/40 (Letter Score 78-69)**

|                                                   | <b>Aflibercept<br/>(N = 85)</b> | <b>Bevacizumab<br/>(N = 82)</b> | <b>Ranibizumab<br/>(N = 86)</b> |
|---------------------------------------------------|---------------------------------|---------------------------------|---------------------------------|
| <b>Baseline Volume - Mean ± SD</b>                | 8.3±1.2                         | 8.2±1.3                         | 8.6±1.4                         |
| <b>Volume at 2 Year - Mean ± SD</b>               | 7.1±0.8                         | 7.5±1.1                         | 7.2±0.9                         |
| <b>Change in Volume from Baseline - Mean ± SD</b> | -1.2±1.3                        | -0.7±1.1                        | -1.3±1.3                        |

SD = standard deviation

In addition to participants missing the 2-year visit (see Figure S1), 38 in the aflibercept group, 32 in the bevacizumab group, and 33 in the ranibizumab group had 2-year visits but unusable OCT data to compute change due to the scan being missing or ungradable at either baseline or 2 year.

Baseline volume values were converted from the thickness value measured on a Spectralis or Cirrus OCT machine to a Stratus equivalent value for 456 scans. 2-year volume values were converted from a thickness value measured on a Spectralis or Cirrus OCT machine to a Stratus equivalent value for 472 scans. When calculating change in volume, measurements taken on the same machine at both visits were not converted, because the conversion equation slope is nearly 1 and the constant difference does not affect the change calculation. Therefore, change in volume was calculated after converting either the baseline and/or follow-up value from Spectralis or Cirrus to a Stratus equivalent value in 26 eyes.

**Table S9. Pre-Specified Systemic Adverse Events through 2 Year: Stratified by Whether Bilateral Study Drug was Received at any Time During the Study**

| <i>Participants with Unilateral Study Anti-VEGF Treatment at all times during the study</i>                                                                       |                                  |                                  |                                  |
|-------------------------------------------------------------------------------------------------------------------------------------------------------------------|----------------------------------|----------------------------------|----------------------------------|
|                                                                                                                                                                   | <b>Aflibercept<br/>(N = 80)</b>  | <b>Bevacizumab<br/>(N = 84)</b>  | <b>Ranibizumab<br/>(N = 86)</b>  |
| <b>Vascular Events According to the Antiplatelet Trialists' Collaboration<sup>5</sup> occurring at least once at any time during the study (No. Participants)</b> |                                  |                                  |                                  |
| Non-fatal myocardial infarction                                                                                                                                   | 2 (3%)                           | 0                                | 2 (2%)                           |
| Non-fatal stroke                                                                                                                                                  | 1 (1%)                           | 3 (4%)                           | 4 (5%)                           |
| Vascular death (from any potential vascular or unknown cause)                                                                                                     | 1 (1%)                           | 4 (5%)                           | 4 (5%)                           |
| Any Antiplatelet Trialists' Collaboration Event                                                                                                                   | 4 (5%)                           | 7 (8%)                           | 10 (12%)                         |
| <b>Pre-specified Systemic Events occurring at least once at any time during the study (No. Participants)</b>                                                      |                                  |                                  |                                  |
| Death (any cause)                                                                                                                                                 | 2 (3%)                           | 7 (8%)                           | 6 (7%)                           |
| Hospitalization                                                                                                                                                   | 28 (35%)                         | 23 (27%)                         | 29 (34%)                         |
| Serious adverse event                                                                                                                                             | 34 (43%)                         | 27 (32%)                         | 32 (37%)                         |
| Gastrointestinal <sup>‡</sup>                                                                                                                                     | 22 (28%)                         | 22 (26%)                         | 24 (28%)                         |
| Kidney <sup>§</sup>                                                                                                                                               | 16 (20%)                         | 9 (11%)                          | 6 (7%)                           |
| Hypertension                                                                                                                                                      | 10 (13%)                         | 6 (7%)                           | 10 (12%)                         |
| <i>Participants with Bilateral Study Anti-VEGF Treatment at any time during the study</i>                                                                         |                                  |                                  |                                  |
|                                                                                                                                                                   | <b>Aflibercept<br/>(N = 144)</b> | <b>Bevacizumab<br/>(N = 134)</b> | <b>Ranibizumab<br/>(N = 132)</b> |
| <b>Vascular Events According to the Antiplatelet Trialists' Collaboration<sup>5</sup> occurring at least once at any time during the study (No. Participants)</b> |                                  |                                  |                                  |
| Non-fatal myocardial infarction                                                                                                                                   | 5 (3%)                           | 3 (2%)                           | 4 (3%)                           |
| Non-fatal stroke                                                                                                                                                  | 1 (<1%)                          | 3 (2%)                           | 7 (5%)                           |
| Vascular death (from any potential vascular or unknown cause)                                                                                                     | 2 (1%)                           | 4 (3%)                           | 5 (4%)                           |
| Any Antiplatelet Trialists' Collaboration Event                                                                                                                   | 8 (6%)                           | 10(7%)                           | 16 (12%)                         |
| <b>Pre-specified Systemic Events occurring at least once at any time during the study (No. Participants)</b>                                                      |                                  |                                  |                                  |
| Death (any cause)                                                                                                                                                 | 3 (2%)                           | 6 (4%)                           | 5 (4%)                           |
| Hospitalization                                                                                                                                                   | 49 (34%)                         | 48 (36%)                         | 44 (33%)                         |
| Serious adverse event                                                                                                                                             | 54 (38%)                         | 54 (40%)                         | 50 (38%)                         |
| Gastrointestinal <sup>‡</sup>                                                                                                                                     | 45 (31%)                         | 42 (31%)                         | 36 (37%)                         |
| Kidney <sup>§</sup>                                                                                                                                               | 34 (24%)                         | 37 (28%)                         | 29 (22%)                         |
| Hypertension                                                                                                                                                      | 29 (20%)                         | 21 (16%)                         | 34 (26%)                         |

‡Includes events with a Medical Dictionary for Regulatory Activities system organ class of gastrointestinal disorder.

§Includes a subset of Medical Dictionary for Regulatory Activities system organ class of renal and urinary disorders events indicative of intrinsic kidney disease, plus increased/abnormal blood creatinine or renal transplant from other system organ classes.

**Table S10. Post Hoc Analysis: Antiplatelet Trialists' Collaboration Events through 2 Year: Stratified by Whether Participant had Myocardial Infarction or Stroke Prior to Baseline**

| <i>Participants with No Myocardial Infarction or Stroke Prior to Baseline</i>                                                                                     |                                  |                                  |                                  |
|-------------------------------------------------------------------------------------------------------------------------------------------------------------------|----------------------------------|----------------------------------|----------------------------------|
|                                                                                                                                                                   | <b>Aflibercept<br/>(N = 203)</b> | <b>Bevacizumab<br/>(N = 193)</b> | <b>Ranibizumab<br/>(N = 193)</b> |
| <b>Vascular Events According to the Antiplatelet Trialists' Collaboration<sup>5</sup> occurring at least once at any time during the study (No. Participants)</b> |                                  |                                  |                                  |
| Non-fatal myocardial infarction                                                                                                                                   | 6 (3%)                           | 3 (2%)                           | 4 (2%)                           |
| Non-fatal stroke                                                                                                                                                  | 2 (<1%)                          | 5 (3%)                           | 6 (3%)                           |
| Vascular death (from any potential vascular or unknown cause)                                                                                                     | 2 (<1%)                          | 4 (2%)                           | 7 (4%)                           |
| Any Antiplatelet Trialists' Collaboration Event                                                                                                                   | 10 (5%)                          | 12 (6%)                          | 17 (9%)                          |
| <i>Participants with Myocardial Infarction or Stroke Prior to Baseline</i>                                                                                        |                                  |                                  |                                  |
|                                                                                                                                                                   | <b>Aflibercept<br/>(N = 21)</b>  | <b>Bevacizumab<br/>(N = 25)</b>  | <b>Ranibizumab<br/>(N = 25)</b>  |
| <b>Vascular Events According to the Antiplatelet Trialists' Collaboration<sup>5</sup> occurring at least once at any time during the study (No. Participants)</b> |                                  |                                  |                                  |
| Non-fatal myocardial infarction                                                                                                                                   | 1 (5%)                           | 0                                | 2 (8%)                           |
| Non-fatal stroke                                                                                                                                                  | 0                                | 1 (4%)                           | 5 (20%)                          |
| Vascular death (from any potential vascular or unknown cause)                                                                                                     | 1 (5%)                           | 4 (16%)                          | 2 (8%)                           |
| Any Antiplatelet Trialists' Collaboration Event                                                                                                                   | 2 (10%)                          | 5 (20%)                          | 9 (36%)                          |

Global P-value from Poisson model with robust variance estimation using the log link<sup>4</sup> adjusting for prior myocardial infarction, prior stroke: P=0.06.

**Table S11. Post Hoc Analysis: Events by Medical Dictionary for Regulatory Activities System Organ Class at any Time During the Study**

|                                                                             | Aflibercept<br>(N = 224) | Bevacizumab<br>(N = 218) | Ranibizumab<br>(N = 218) | P Value* |
|-----------------------------------------------------------------------------|--------------------------|--------------------------|--------------------------|----------|
| <b>Number of Participants with an Event in the Given System Organ Class</b> |                          |                          |                          |          |
| Blood and lymphatic system disorders                                        | 27 (12%)                 | 22 (10%)                 | 19 (9%)                  | 0.52     |
| Cardiac disorders                                                           | 28 (13%)                 | 28 (13%)                 | 40 (18%)                 | 0.16     |
| Ear and labyrinth disorders                                                 | 11 (5%)                  | 8 (4%)                   | 2 (1%)                   | 0.04**   |
| Endocrine disorders                                                         | 44 (20%)                 | 43 (20%)                 | 39 (18%)                 | 0.86     |
| Eye disorders                                                               | 191 (85%)                | 192 (88%)                | 187 (86%)                | 0.66     |
| Gastrointestinal disorders                                                  | 67 (30%)                 | 64 (29%)                 | 60 (28%)                 | 0.85     |
| General disorders and administration site conditions                        | 51 (23%)                 | 49 (22%)                 | 39 (18%)                 | 0.38     |
| Hepatobiliary disorders                                                     | 4 (2%)                   | 7 (3%)                   | 3 (1%)                   | 0.44     |
| Immune system disorders                                                     | 19 (8%)                  | 17 (8%)                  | 14 (6%)                  | 0.70     |
| Infections and infestations                                                 | 40 (18%)                 | 49 (22%)                 | 41 (19%)                 | 0.44     |
| Injury, poisoning and procedural complications                              | 31 (14%)                 | 32 (15%)                 | 25 (11%)                 | 0.58     |
| Investigations                                                              | 35 (16%)                 | 28 (13%)                 | 36 (17%)                 | 0.53     |
| Metabolism and nutrition disorders                                          | 49 (22%)                 | 39 (18%)                 | 39 (18%)                 | 0.49     |
| Musculoskeletal and connective tissue disorders                             | 76 (34%)                 | 81 (37%)                 | 76 (35%)                 | 0.76     |
| Neoplasms benign, malignant and unspecified<br>(including cysts and polyps) | 5 (2%)                   | 6 (3%)                   | 5 (2%)                   | 0.95     |
| Nervous system disorders                                                    | 61 (27%)                 | 59 (27%)                 | 73 (33%)                 | 0.25     |
| Psychiatric disorders                                                       | 22 (10%)                 | 25 (11%)                 | 23 (11%)                 | 0.88     |
| Renal and urinary disorders                                                 | 66 (29%)                 | 63 (29%)                 | 51 (23%)                 | 0.29     |
| Reproductive system and breast disorders                                    | 7 (3%)                   | 6 (3%)                   | 9 (4%)                   | 0.74     |
| Respiratory, thoracic and mediastinal disorders                             | 101 (45%)                | 98 (45%)                 | 96 (44%)                 | 0.98     |
| Skin and subcutaneous tissue disorders                                      | 54 (24%)                 | 43 (20%)                 | 46 (21%)                 | 0.52     |
| Social circumstances                                                        | 0                        | 1 (<1%)                  | 0                        | 0.66     |
| Surgical and medical procedures                                             | 24 (11%)                 | 27 (12%)                 | 29 (13%)                 | 0.72     |
| Vascular disorders                                                          | 53 (24%)                 | 47 (22%)                 | 67 (31%)                 | 0.07     |

\*Global (overall 3 group comparison) P-value from Fisher's Exact Test.

\*\*Pairwise comparisons from Fisher's Exact Test (adjusted for multiple comparisons by taking the maximum of the global and pairwise comparison P-values): aflibercept-bevacizumab: P=0.64, aflibercept-ranibizumab: P=0.04, bevacizumab-ranibizumab: P=0.11.

| <b>Table S12. Post Hoc Analysis: Cardiovascular Events at any Time During the Study</b>    |                              |                              |                              |                |
|--------------------------------------------------------------------------------------------|------------------------------|------------------------------|------------------------------|----------------|
| <i>Overall</i>                                                                             |                              |                              |                              |                |
| <b>Events occurring at least once (No. Participants)</b>                                   | <b>Aflibercept (N = 224)</b> | <b>Bevacizumab (N = 218)</b> | <b>Ranibizumab (N = 218)</b> | <b>P Value</b> |
| Any Cardiovascular Event,† excluding Hypertension                                          | 44 (20%)                     | 49 (22%)                     | 59 (27%)                     | 0.18*          |
| Any Cardiovascular Event†                                                                  | 69 (31%)                     | 69 (32%)                     | 82 (38%)                     | 0.26‡          |
| Cardiac Events                                                                             | 30 (13%)                     | 34 (16%)                     | 41 (19%)                     |                |
| Cerebrovascular Events                                                                     | 4 (2%)                       | 8 (4%)                       | 18 (8%)                      |                |
| Peripheral Vascular Disease Events                                                         | 2 (<1%)                      | 5 (2%)                       | 5 (2%)                       |                |
| Venous Disease Events                                                                      | 4 (2%)                       | 3 (1%)                       | 3 (1%)                       |                |
| Hypertension Events                                                                        | 39 (17%)                     | 27 (12%)                     | 44 (20%)                     |                |
| Other Cardiovascular Events                                                                | 12 (5%)                      | 10 (5%)                      | 11 (5%)                      |                |
| <i>Participants with Unilateral Study Anti-VEGF Treatment at any time during the study</i> |                              |                              |                              |                |
| <b>Events occurring at least once (No. Participants)</b>                                   | <b>Aflibercept (N = 80)</b>  | <b>Bevacizumab (N = 84)</b>  | <b>Ranibizumab (N = 86)</b>  |                |
| Any Cardiovascular Event,† excluding Hypertension                                          | 13 (16%)                     | 18 (21%)                     | 23 (27%)                     |                |
| Any Cardiovascular Event†                                                                  | 21 (26%)                     | 22 (26%)                     | 28 (33%)                     |                |
| Cardiac Events                                                                             | 7 (9%)                       | 12 (14%)                     | 15 (17%)                     |                |
| Cerebrovascular Events                                                                     | 1 (1%)                       | 3 (4%)                       | 9 (10%)                      |                |
| Peripheral Vascular Disease Events                                                         | 2 (3%)                       | 0                            | 4 (5%)                       |                |
| Venous Disease Events                                                                      | 2 (3%)                       | 1 (1%)                       | 1 (1%)                       |                |
| Hypertension Events                                                                        | 10 (13%)                     | 6 (7%)                       | 10 (12%)                     |                |
| Other Cardiovascular Events                                                                | 4 (5%)                       | 4 (5%)                       | 1 (1%)                       |                |
| <i>Participants with Bilateral Study Anti-VEGF Treatment at any time during the study</i>  |                              |                              |                              |                |
| <b>Events occurring at least once (No. Participants)</b>                                   | <b>Aflibercept (N = 144)</b> | <b>Bevacizumab (N = 134)</b> | <b>Ranibizumab (N = 132)</b> |                |
| Any Cardiovascular Event,† excluding Hypertension                                          | 31 (22%)                     | 31 (23%)                     | 36 (27%)                     |                |
| Any Cardiovascular Event †                                                                 | 48 (33%)                     | 47 (35%)                     | 54 (41%)                     |                |
| Cardiac Events                                                                             | 23 (16%)                     | 22 (16%)                     | 26 (20%)                     |                |
| Cerebrovascular Events                                                                     | 3 (2%)                       | 5 (4%)                       | 9 (7%)                       |                |
| Peripheral Vascular Disease Events                                                         | 0                            | 5 (4%)                       | 1 (<1%)                      |                |
| Venous Disease Events                                                                      | 2 (1%)                       | 2 (1%)                       | 2 (2%)                       |                |
| Hypertension Events                                                                        | 29 (20%)                     | 21 (16%)                     | 34 (26%)                     |                |
| Other Cardiovascular Events                                                                | 8 (6%)                       | 6 (4%)                       | 10 (8%)                      |                |

\*Global (overall 3 group comparison) P-value from Fisher's Exact Test. Global P-value from Poisson model with robust variance estimation using the log link<sup>4</sup> adjusting for for gender, age at baseline, Hemoglobin A1c at baseline, diabetes type, diabetes duration at baseline, insulin use, prior coronary artery disease, prior myocardial infarction, prior stroke, prior transient ischemic attack, prior hypertension, smoking status: P=0.26.

‡Global (overall 3 group comparison) P-value from Fisher's Exact Test. Global P-value from Poisson model with robust variance estimation using the log link<sup>4</sup> adjusting for gender, age at baseline, Hemoglobin A1c at baseline, diabetes type, diabetes duration at baseline, insulin use, prior coronary artery disease, prior myocardial infarction, prior stroke, prior transient ischemic attack, prior hypertension, smoking status: P=0.41.

† Includes events with a Medical Dictionary for Regulatory Activities system organ class of cardiac disorder or vascular disorder as coded by the medical monitor. The following additional events not coded under these systems but related to a cardiac or vascular event or intervention are also included in the cardiovascular definition: cardiac murmur, cardiac pacemaker insertion/replacement, coronary arterial stent insertion, heart rate irregular, heart transplant, implantable defibrillator insertion, stent placement, and troponin increased. Participants with multiple events are only included once in the overall tabulation but could be included in more than one of the subcategories.



**Table S13. All Ocular Events Occurring in the Study Eye**

| <b>No. Events (No. Participants)</b> | <b>Aflibercept</b> | <b>Bevacizumab</b> | <b>Ranibizumab</b> |
|--------------------------------------|--------------------|--------------------|--------------------|
| <b>Anterior chamber</b>              |                    |                    |                    |
| Anterior chamber cell                | 2 (2)              | 1 (1)              | 3 (2)              |
| Anterior chamber opacity             | 1 (1)              | 0 (0)              | 0 (0)              |
| Flat anterior chamber of eye         | 0 (0)              | 1 (1)              | 1 (1)              |
| Foreign body in anterior chamber     | 0 (0)              | 1 (1)              | 0 (0)              |
| <b>Choroid</b>                       |                    |                    |                    |
| Choroidal neovascularisation         | 1 (1)              | 1 (1)              | 0 (0)              |
| <b>Conjunctiva</b>                   |                    |                    |                    |
| Conjunctival haemorrhage             | 55 (34)            | 88 (41)            | 45 (26)            |
| Conjunctival hyperaemia              | 0 (0)              | 1 (1)              | 2 (2)              |
| Conjunctival oedema                  | 3 (2)              | 0 (0)              | 0 (0)              |
| Conjunctivitis                       | 4 (4)              | 0 (0)              | 2 (2)              |
| Conjunctivitis allergic              | 0 (0)              | 3 (3)              | 2 (2)              |
| Conjunctivitis viral                 | 0 (0)              | 0 (0)              | 1 (1)              |
| Eye discharge                        | 1 (1)              | 2 (2)              | 1 (1)              |
| Ocular hyperaemia                    | 0 (0)              | 8 (8)              | 11 (11)            |
| Pinguecula                           | 0 (0)              | 0 (0)              | 1 (1)              |
| <b>Cornea</b>                        |                    |                    |                    |
| Corneal abrasion                     | 6 (3)              | 11 (10)            | 7 (7)              |
| Corneal disorder                     | 1 (1)              | 0 (0)              | 4 (3)              |
| Corneal erosion                      | 1 (1)              | 0 (0)              | 0 (0)              |
| Corneal oedema                       | 1 (1)              | 0 (0)              | 1 (1)              |
| Corneal opacity                      | 1 (1)              | 0 (0)              | 0 (0)              |
| Corneal pigmentation                 | 2 (2)              | 0 (0)              | 0 (0)              |
| Corneal scar                         | 1 (1)              | 0 (0)              | 0 (0)              |
| Keratitis                            | 0 (0)              | 2 (2)              | 0 (0)              |
| Keratitis sicca                      | 1 (1)              | 0 (0)              | 0 (0)              |
| Keratopathy                          | 1 (1)              | 0 (0)              | 0 (0)              |
| Punctate keratitis                   | 10 (6)             | 2 (2)              | 5 (4)              |
| <b>External</b>                      |                    |                    |                    |
| Arthropod bite                       | 0 (0)              | 0 (0)              | 1 (1)              |
| Dry eye                              | 23 (20)            | 12 (12)            | 20 (20)            |
| Dry eye syndrome                     | 2 (2)              | 2 (2)              | 2 (2)              |
| Eye infection                        | 1 (1)              | 0 (0)              | 0 (0)              |
| Eye irritation                       | 25 (16)            | 27 (17)            | 23 (15)            |
| Eye swelling                         | 1 (1)              | 4 (3)              | 2 (2)              |
| Hypersensitivity                     | 1 (1)              | 0 (0)              | 0 (0)              |
| Lacrimation increased                | 17 (15)            | 6 (6)              | 13 (11)            |
| Ocular discomfort                    | 6 (4)              | 4 (4)              | 6 (5)              |
| Ophthalmic herpes simplex            | 0 (0)              | 1 (1)              | 0 (0)              |
| Periorbital contusion                | 0 (0)              | 2 (2)              | 0 (0)              |
| Seasonal allergy                     | 0 (0)              | 0 (0)              | 1 (1)              |

| <b>No. Events (No. Participants)</b> | <b>Aflibercept</b> | <b>Bevacizumab</b> | <b>Ranibizumab</b> |
|--------------------------------------|--------------------|--------------------|--------------------|
| <b>Glaucoma-IOP</b>                  |                    |                    |                    |
| Angle closure glaucoma               | 0 (0)              | 0 (0)              | 1 (1)              |
| Borderline glaucoma                  | 1 (1)              | 0 (0)              | 1 (1)              |
| Glaucoma                             | 0 (0)              | 1 (1)              | 4 (3)              |
| Intraocular pressure increased       | 8 (8)              | 2 (2)              | 9 (7)              |
| Ocular hypertension                  | 2 (2)              | 6 (5)              | 2 (2)              |
| <b>Inflammation</b>                  |                    |                    |                    |
| Anterior chamber flare               | 1 (1)              | 0 (0)              | 1 (1)              |
| Choroiditis                          | 0 (0)              | 1 (1)              | 0 (0)              |
| Episcleritis                         | 1 (1)              | 0 (0)              | 1 (1)              |
| Iritis                               | 5 (3)              | 1 (1)              | 1 (1)              |
| <b>Injection-related</b>             |                    |                    |                    |
| Injection site irritation            | 0 (0)              | 0 (0)              | 1 (1)              |
| <b>Iris</b>                          |                    |                    |                    |
| Post procedural complication         | 0 (0)              | 1 (1)              | 0 (0)              |
| <b>Lens</b>                          |                    |                    |                    |
| Cataract                             | 31 (28)            | 22 (20)            | 17 (13)            |
| Cataract cortical                    | 3 (3)              | 2 (2)              | 4 (4)              |
| Cataract nuclear                     | 2 (2)              | 4 (4)              | 3 (3)              |
| Cataract operation                   | 3 (3)              | 1 (1)              | 7 (7)              |
| Cataract operation complication      | 0 (0)              | 1 (1)              | 0 (0)              |
| Cataract subcapsular                 | 17 (17)            | 6 (6)              | 10 (10)            |
| Posterior capsule opacification      | 8 (8)              | 6 (6)              | 5 (4)              |
| <b>Lids</b>                          |                    |                    |                    |
| Blepharal papilloma                  | 1 (1)              | 0 (0)              | 2 (2)              |
| Blepharitis                          | 7 (6)              | 2 (2)              | 4 (4)              |
| Chalazion                            | 1 (1)              | 0 (0)              | 0 (0)              |
| Cutis laxa                           | 1 (1)              | 2 (2)              | 0 (0)              |
| Dermatitis contact                   | 2 (1)              | 0 (0)              | 0 (0)              |
| Ecchymosis                           | 0 (0)              | 0 (0)              | 1 (1)              |
| Eyelid margin crusting               | 3 (3)              | 1 (1)              | 0 (0)              |
| Eyelid oedema                        | 1 (1)              | 1 (1)              | 1 (1)              |
| Eyelid ptosis                        | 1 (1)              | 0 (0)              | 1 (1)              |
| Eyelid twitching                     | 1 (1)              | 1 (1)              | 2 (2)              |
| Hordeolum                            | 2 (2)              | 1 (1)              | 2 (2)              |
| Papilloma                            | 0 (0)              | 2 (2)              | 0 (0)              |
| Trichiasis                           | 1 (1)              | 1 (1)              | 0 (0)              |
| <b>Miscellaneous-eye</b>             |                    |                    |                    |
| Asthenopia                           | 1 (1)              | 0 (0)              | 1 (1)              |
| Blepharospasm                        | 0 (0)              | 1 (1)              | 0 (0)              |
| Fatigue                              | 0 (0)              | 1 (1)              | 0 (0)              |
| <b>Optic nerve</b>                   |                    |                    |                    |
| Optic atrophy                        | 1 (1)              | 0 (0)              | 0 (0)              |
| Optic disc disorder                  | 1 (1)              | 0 (0)              | 1 (1)              |

| <b>No. Events (No. Participants)</b> | <b>Aflibercept</b> | <b>Bevacizumab</b> | <b>Ranibizumab</b> |
|--------------------------------------|--------------------|--------------------|--------------------|
| Optic nerve cupping                  | 1 (1)              | 0 (0)              | 0 (0)              |
| <b>Retina</b>                        |                    |                    |                    |
| Chorioretinal atrophy                | 1 (1)              | 1 (1)              | 1 (1)              |
| Cystoid macular oedema               | 0 (0)              | 1 (1)              | 1 (1)              |
| Diabetic retinal oedema              | 4 (4)              | 4 (4)              | 2 (2)              |
| Diabetic retinopathy                 | 1 (1)              | 5 (4)              | 1 (1)              |
| Macular fibrosis                     | 8 (8)              | 11 (10)            | 2 (2)              |
| Macular hole                         | 0 (0)              | 1 (1)              | 0 (0)              |
| Macular ischaemia                    | 2 (2)              | 2 (2)              | 1 (1)              |
| Macular oedema                       | 1 (1)              | 0 (0)              | 1 (1)              |
| Maculopathy                          | 0 (0)              | 2 (2)              | 0 (0)              |
| Retinal aneurysm                     | 0 (0)              | 0 (0)              | 1 (1)              |
| Retinal artery embolism              | 1 (1)              | 2 (2)              | 2 (2)              |
| Retinal cyst                         | 0 (0)              | 0 (0)              | 1 (1)              |
| Retinal degeneration                 | 0 (0)              | 0 (0)              | 1 (1)              |
| Retinal detachment                   | 2 (2)              | 2 (2)              | 1 (1)              |
| Retinal disorder                     | 0 (0)              | 3 (3)              | 0 (0)              |
| Retinal exudates                     | 8 (8)              | 6 (6)              | 5 (4)              |
| Retinal haemorrhage                  | 3 (3)              | 7 (6)              | 6 (6)              |
| Retinal ischaemia                    | 0 (0)              | 2 (2)              | 1 (1)              |
| Retinal neovascularisation           | 2 (2)              | 2 (2)              | 2 (1)              |
| Retinal pigment epitheliopathy       | 1 (1)              | 0 (0)              | 0 (0)              |
| Retinal tear                         | 1 (1)              | 1 (1)              | 1 (1)              |
| Retinal vascular disorder            | 0 (0)              | 0 (0)              | 3 (3)              |
| Retinal vein occlusion               | 0 (0)              | 1 (1)              | 1 (1)              |
| Retinopathy                          | 1 (1)              | 1 (1)              | 2 (2)              |
| Retinopathy hypertensive             | 1 (1)              | 1 (1)              | 0 (0)              |
| Vitreous adhesions                   | 2 (2)              | 2 (2)              | 1 (1)              |
| <b>Sensation-pain</b>                |                    |                    |                    |
| Abnormal sensation in eye            | 0 (0)              | 1 (1)              | 1 (1)              |
| Eye injury                           | 0 (0)              | 1 (1)              | 0 (0)              |
| Eye pain                             | 35 (25)            | 44 (32)            | 23 (23)            |
| Eye pruritus                         | 14 (11)            | 14 (11)            | 19 (16)            |
| Eyelid pain                          | 1 (1)              | 3 (3)              | 0 (0)              |
| Facial pain                          | 1 (1)              | 0 (0)              | 0 (0)              |
| Foreign body sensation in eyes       | 6 (5)              | 8 (6)              | 7 (6)              |
| Headache                             | 0 (0)              | 1 (1)              | 1 (1)              |
| Pain                                 | 0 (0)              | 1 (1)              | 2 (1)              |
| <b>Strabismus</b>                    |                    |                    |                    |
| Strabismus                           | 0 (0)              | 1 (1)              | 0 (0)              |
| <b>Visual field</b>                  |                    |                    |                    |
| Scotoma                              | 0 (0)              | 2 (2)              | 0 (0)              |
| Visual field defect                  | 0 (0)              | 1 (1)              | 0 (0)              |
| <b>Visual symptoms/abnormality</b>   |                    |                    |                    |

| <b>No. Events (No. Participants)</b> | <b>Aflibercept</b> | <b>Bevacizumab</b> | <b>Ranibizumab</b> |
|--------------------------------------|--------------------|--------------------|--------------------|
| Altered visual depth perception      | 0 (0)              | 2 (2)              | 0 (0)              |
| Colour blindness acquired            | 0 (0)              | 1 (1)              | 0 (0)              |
| Diplopia                             | 6 (6)              | 3 (3)              | 9 (9)              |
| Glare                                | 1 (1)              | 3 (3)              | 3 (3)              |
| Halo vision                          | 1 (1)              | 0 (0)              | 0 (0)              |
| Metamorphopsia                       | 6 (4)              | 7 (7)              | 2 (2)              |
| Migraine with aura                   | 1 (1)              | 1 (1)              | 1 (1)              |
| Night blindness                      | 1 (1)              | 1 (1)              | 0 (0)              |
| Photophobia                          | 7 (7)              | 5 (5)              | 4 (4)              |
| Photopsia                            | 7 (6)              | 5 (5)              | 11 (9)             |
| Reading disorder                     | 0 (0)              | 1 (1)              | 0 (0)              |
| Vision blurred                       | 65 (54)            | 58 (51)            | 69 (50)            |
| Visual acuity reduced                | 26 (22)            | 29 (27)            | 29 (22)            |
| Visual impairment                    | 15 (12)            | 11 (11)            | 14 (10)            |
| <b>Vitreous</b>                      |                    |                    |                    |
| Endophthalmitis                      | 0 (0)              | 1 (1)              | 0 (0)              |
| Hyalosis asteroid                    | 0 (0)              | 0 (0)              | 1 (1)              |
| Vitreous cells                       | 1 (1)              | 0 (0)              | 1 (1)              |
| Vitreous degeneration                | 1 (1)              | 4 (3)              | 1 (1)              |
| Vitreous detachment                  | 9 (9)              | 16 (15)            | 10 (9)             |
| Vitreous disorder                    | 0 (0)              | 0 (0)              | 1 (1)              |
| Vitreous floaters                    | 51 (41)            | 71 (54)            | 61 (49)            |
| Vitreous haemorrhage                 | 17 (15)            | 27 (17)            | 13 (10)            |
| Vitreous opacities                   | 0 (0)              | 1 (1)              | 0 (0)              |

Events based on medical monitor using Medical Dictionary for Regulatory Activities coding.

**Table S14. All Ocular Adverse Events Occurring in the Non-Study Eye from the First Non-Study Eye Injection**

| <b>No. Events (No. Participants)</b> | <b>Aflibercept</b> | <b>Bevacizumab</b> | <b>Ranibizumab</b> |
|--------------------------------------|--------------------|--------------------|--------------------|
| <b>Anterior chamber</b>              |                    |                    |                    |
| Anterior chamber cell                | 0 (0)              | 1 (1)              | 1 (1)              |
| <b>Conjunctiva</b>                   |                    |                    |                    |
| Conjunctival haemorrhage             | 30 (13)            | 49 (17)            | 16 (8)             |
| Conjunctival hyperaemia              | 0 (0)              | 1 (1)              | 0 (0)              |
| Conjunctivitis                       | 0 (0)              | 1 (1)              | 0 (0)              |
| Conjunctivitis allergic              | 1 (1)              | 0 (0)              | 0 (0)              |
| Eye discharge                        | 1 (1)              | 1 (1)              | 0 (0)              |
| Ocular hyperaemia                    | 0 (0)              | 2 (2)              | 0 (0)              |
| Pinguecula                           | 0 (0)              | 0 (0)              | 1 (1)              |
| Pterygium                            | 0 (0)              | 1 (1)              | 0 (0)              |
| <b>Cornea</b>                        |                    |                    |                    |
| Corneal abrasion                     | 2 (2)              | 8 (5)              | 0 (0)              |
| Corneal defect                       | 0 (0)              | 0 (0)              | 1 (1)              |
| Corneal disorder                     | 0 (0)              | 0 (0)              | 1 (1)              |
| Corneal dystrophy                    | 1 (1)              | 0 (0)              | 0 (0)              |
| Corneal erosion                      | 0 (0)              | 0 (0)              | 1 (1)              |
| Corneal irritation                   | 0 (0)              | 2 (2)              | 0 (0)              |
| Corneal oedema                       | 1 (1)              | 0 (0)              | 3 (2)              |
| Corneal scar                         | 1 (1)              | 0 (0)              | 0 (0)              |
| Keratitis                            | 0 (0)              | 1 (1)              | 0 (0)              |
| Punctate keratitis                   | 3 (3)              | 1 (1)              | 0 (0)              |
| <b>External</b>                      |                    |                    |                    |
| Arthropod sting                      | 1 (1)              | 0 (0)              | 0 (0)              |
| Dry eye                              | 9 (8)              | 9 (9)              | 10 (10)            |
| Dry eye syndrome                     | 0 (0)              | 1 (1)              | 0 (0)              |
| Eye infection                        | 1 (1)              | 0 (0)              | 0 (0)              |
| Eye irritation                       | 14 (8)             | 9 (6)              | 12 (9)             |
| Eye swelling                         | 0 (0)              | 1 (1)              | 0 (0)              |
| Lacrimation increased                | 10 (10)            | 1 (1)              | 5 (5)              |
| Ocular discomfort                    | 3 (1)              | 3 (3)              | 6 (4)              |
| Ophthalmic herpes simplex            | 0 (0)              | 2 (1)              | 0 (0)              |
| Periorbital contusion                | 0 (0)              | 1 (1)              | 1 (1)              |
| Seasonal allergy                     | 0 (0)              | 0 (0)              | 1 (1)              |
| <b>Glaucoma-IOP</b>                  |                    |                    |                    |
| Angle closure glaucoma               | 0 (0)              | 0 (0)              | 1 (1)              |
| Borderline glaucoma                  | 1 (1)              | 0 (0)              | 1 (1)              |
| Glaucoma                             | 0 (0)              | 0 (0)              | 4 (4)              |
| Hypotony of eye                      | 1 (1)              | 0 (0)              | 0 (0)              |
| Intraocular pressure increased       | 3 (3)              | 4 (3)              | 4 (4)              |
| Ocular hypertension                  | 2 (2)              | 2 (2)              | 1 (1)              |
| <b>Inflammation</b>                  |                    |                    |                    |

| <b>No. Events (No. Participants)</b> | <b>Aflibercept</b> | <b>Bevacizumab</b> | <b>Ranibizumab</b> |
|--------------------------------------|--------------------|--------------------|--------------------|
| Anterior chamber flare               | 1 (1)              | 1 (1)              | 0 (0)              |
| Iritis                               | 1 (1)              | 1 (1)              | 1 (1)              |
| <b>Iris</b>                          |                    |                    |                    |
| Iris adhesions                       | 1 (1)              | 0 (0)              | 0 (0)              |
| Iris neovascularisation              | 0 (0)              | 1 (1)              | 0 (0)              |
| <b>Lens</b>                          |                    |                    |                    |
| Cataract                             | 15 (14)            | 12 (12)            | 6 (6)              |
| Cataract cortical                    | 2 (2)              | 3 (3)              | 1 (1)              |
| Cataract nuclear                     | 1 (1)              | 2 (2)              | 2 (2)              |
| Cataract operation                   | 2 (2)              | 1 (1)              | 1 (1)              |
| Cataract operation complication      | 0 (0)              | 0 (0)              | 1 (1)              |
| Cataract subcapsular                 | 6 (6)              | 3 (3)              | 6 (6)              |
| Posterior capsule opacification      | 6 (5)              | 3 (3)              | 6 (5)              |
| <b>Lids</b>                          |                    |                    |                    |
| Acrochordon                          | 0 (0)              | 0 (0)              | 1 (1)              |
| Blepharitis                          | 2 (2)              | 1 (1)              | 4 (4)              |
| Chalazion                            | 1 (1)              | 1 (1)              | 0 (0)              |
| Cutis laxa                           | 0 (0)              | 1 (1)              | 0 (0)              |
| Ecchymosis                           | 1 (1)              | 0 (0)              | 0 (0)              |
| Eyelid margin crusting               | 1 (1)              | 1 (1)              | 0 (0)              |
| Eyelid oedema                        | 1 (1)              | 0 (0)              | 1 (1)              |
| Hordeolum                            | 2 (1)              | 2 (2)              | 0 (0)              |
| Papilloma                            | 0 (0)              | 1 (1)              | 0 (0)              |
| Skin lesion                          | 0 (0)              | 0 (0)              | 1 (1)              |
| <b>Miscellaneous-eye</b>             |                    |                    |                    |
| Fatigue                              | 0 (0)              | 1 (1)              | 0 (0)              |
| <b>Optic nerve</b>                   |                    |                    |                    |
| Optic atrophy                        | 1 (1)              | 1 (1)              | 1 (1)              |
| Optic nerve cupping                  | 1 (1)              | 0 (0)              | 0 (0)              |
| Papilloedema                         | 1 (1)              | 0 (0)              | 0 (0)              |
| <b>Retina</b>                        |                    |                    |                    |
| Chorioretinal atrophy                | 0 (0)              | 1 (1)              | 0 (0)              |
| Cystoid macular oedema               | 0 (0)              | 0 (0)              | 2 (2)              |
| Diabetic retinal oedema              | 12 (10)            | 8 (8)              | 10 (10)            |
| Diabetic retinopathy                 | 2 (2)              | 2 (2)              | 7 (7)              |
| Eye naevus                           | 0 (0)              | 0 (0)              | 1 (1)              |
| Macular degeneration                 | 0 (0)              | 0 (0)              | 1 (1)              |
| Macular fibrosis                     | 5 (5)              | 9 (8)              | 2 (2)              |
| Macular hole                         | 0 (0)              | 2 (1)              | 0 (0)              |
| Macular ischaemia                    | 0 (0)              | 1 (1)              | 0 (0)              |
| Macular oedema                       | 3 (3)              | 0 (0)              | 2 (2)              |
| Retinal aneurysm                     | 2 (1)              | 1 (1)              | 1 (1)              |
| Retinal disorder                     | 0 (0)              | 1 (1)              | 0 (0)              |
| Retinal exudates                     | 4 (4)              | 7 (7)              | 4 (4)              |

| <b>No. Events (No. Participants)</b> | <b>Aflibercept</b> | <b>Bevacizumab</b> | <b>Ranibizumab</b> |
|--------------------------------------|--------------------|--------------------|--------------------|
| Retinal haemorrhage                  | 5 (5)              | 2 (2)              | 7 (7)              |
| Retinal ischaemia                    | 0 (0)              | 1 (1)              | 0 (0)              |
| Retinal laser coagulation            | 1 (1)              | 1 (1)              | 1 (1)              |
| Retinal neovascularisation           | 5 (4)              | 0 (0)              | 0 (0)              |
| Retinal tear                         | 0 (0)              | 0 (0)              | 2 (2)              |
| Retinal vascular disorder            | 1 (1)              | 0 (0)              | 1 (1)              |
| Retinal vein occlusion               | 0 (0)              | 1 (1)              | 0 (0)              |
| Retinopathy                          | 1 (1)              | 1 (1)              | 0 (0)              |
| Retinopathy hypertensive             | 1 (1)              | 0 (0)              | 0 (0)              |
| Vitreous adhesions                   | 1 (1)              | 0 (0)              | 1 (1)              |
| <b>Sensation-pain</b>                |                    |                    |                    |
| Eye contusion                        | 0 (0)              | 0 (0)              | 1 (1)              |
| Eye pain                             | 14 (10)            | 20 (17)            | 11 (7)             |
| Eye pruritus                         | 5 (3)              | 4 (4)              | 15 (12)            |
| Eyelid pain                          | 0 (0)              | 1 (1)              | 0 (0)              |
| Foreign body sensation in eyes       | 3 (3)              | 3 (3)              | 1 (1)              |
| Headache                             | 1 (1)              | 0 (0)              | 2 (2)              |
| Pain                                 | 0 (0)              | 2 (2)              | 0 (0)              |
| <b>Visual field</b>                  |                    |                    |                    |
| Visual field defect                  | 1 (1)              | 1 (1)              | 0 (0)              |
| <b>Visual symptoms/abnormality</b>   |                    |                    |                    |
| Altered visual depth perception      | 0 (0)              | 2 (2)              | 0 (0)              |
| Diplopia                             | 1 (1)              | 0 (0)              | 7 (7)              |
| Glare                                | 2 (2)              | 0 (0)              | 1 (1)              |
| Halo vision                          | 1 (1)              | 0 (0)              | 0 (0)              |
| Metamorphopsia                       | 0 (0)              | 4 (4)              | 2 (2)              |
| Migraine with aura                   | 1 (1)              | 0 (0)              | 0 (0)              |
| Photophobia                          | 7 (7)              | 1 (1)              | 4 (3)              |
| Photopsia                            | 5 (5)              | 6 (6)              | 6 (4)              |
| Reading disorder                     | 0 (0)              | 1 (1)              | 0 (0)              |
| Vision blurred                       | 38 (30)            | 21 (21)            | 43 (37)            |
| Visual acuity reduced                | 12 (9)             | 12 (9)             | 16 (12)            |
| Visual impairment                    | 5 (5)              | 9 (7)              | 5 (3)              |
| <b>Vitreous</b>                      |                    |                    |                    |
| Endophthalmitis                      | 2 (1)              | 0 (0)              | 1 (1)              |
| Foreign body in vitreous             | 0 (0)              | 1 (1)              | 0 (0)              |
| Vitreous cells                       | 1 (1)              | 1 (1)              | 0 (0)              |
| Vitrectomy                           | 0 (0)              | 0 (0)              | 1 (1)              |
| Vitreous degeneration                | 0 (0)              | 3 (2)              | 1 (1)              |
| Vitreous detachment                  | 7 (7)              | 6 (6)              | 2 (2)              |
| Vitreous floaters                    | 34 (25)            | 24 (20)            | 30 (22)            |
| Vitreous haemorrhage                 | 14 (11)            | 18 (12)            | 10 (9)             |

Events based on medical monitor using Medical Dictionary for Regulatory Activities coding.

**Table S15. All Systemic Adverse Events**

| <b>No. Events (No. Participants)</b>        | <b>Aflibercept</b> | <b>Bevacizumab</b> | <b>Ranibizumab</b> |
|---------------------------------------------|--------------------|--------------------|--------------------|
| <b>Blood and lymphatic system disorders</b> |                    |                    |                    |
| Anaemia                                     | 21 (20)            | 11 (11)            | 16 (15)            |
| Anaemia of chronic disease                  | 4 (4)              | 8 (8)              | 2 (2)              |
| Coagulopathy                                | 0 (0)              | 1 (1)              | 0 (0)              |
| Leukocytosis                                | 1 (1)              | 1 (1)              | 0 (0)              |
| Lymphadenitis                               | 0 (0)              | 1 (1)              | 0 (0)              |
| Lymphadenopathy                             | 2 (2)              | 0 (0)              | 0 (0)              |
| Lymphangitis                                | 1 (1)              | 0 (0)              | 0 (0)              |
| Lymphoedema                                 | 2 (2)              | 0 (0)              | 0 (0)              |
| Lymphoma                                    | 0 (0)              | 0 (0)              | 1 (1)              |
| Pancytopenia                                | 0 (0)              | 1 (1)              | 0 (0)              |
| Plasma cell myeloma                         | 0 (0)              | 0 (0)              | 1 (1)              |
| Thrombocytopenia                            | 0 (0)              | 2 (1)              | 0 (0)              |
| <b>Cardiac disorders</b>                    |                    |                    |                    |
| Acute coronary syndrome                     | 0 (0)              | 0 (0)              | 1 (1)              |
| Angina pectoris                             | 1 (1)              | 2 (2)              | 1 (1)              |
| Angina unstable                             | 0 (0)              | 1 (1)              | 0 (0)              |
| Arrhythmia                                  | 1 (1)              | 0 (0)              | 0 (0)              |
| Arteriosclerosis coronary artery            | 2 (2)              | 0 (0)              | 1 (1)              |
| Atrial fibrillation                         | 4 (4)              | 3 (3)              | 5 (5)              |
| Atrial flutter                              | 0 (0)              | 0 (0)              | 2 (2)              |
| Atrioventricular block first degree         | 1 (1)              | 0 (0)              | 0 (0)              |
| Atrioventricular block second degree        | 0 (0)              | 0 (0)              | 2 (2)              |
| Bradycardia                                 | 0 (0)              | 1 (1)              | 5 (4)              |
| Bundle branch block                         | 0 (0)              | 3 (3)              | 0 (0)              |
| Cardiac arrest                              | 0 (0)              | 3 (3)              | 2 (2)              |
| Cardiac failure                             | 0 (0)              | 1 (1)              | 3 (3)              |
| Cardiac failure congestive                  | 12 (11)            | 20 (11)            | 17 (12)            |
| Cardiomegaly                                | 1 (1)              | 1 (1)              | 0 (0)              |
| Cardiomyopathy                              | 2 (2)              | 0 (0)              | 2 (2)              |
| Coronary artery disease                     | 4 (4)              | 7 (7)              | 8 (8)              |
| Diabetic cardiomyopathy                     | 0 (0)              | 1 (1)              | 0 (0)              |
| Diastolic dysfunction                       | 2 (1)              | 1 (1)              | 2 (2)              |
| Hypertensive heart disease                  | 3 (2)              | 2 (2)              | 1 (1)              |
| Mitral valve calcification                  | 0 (0)              | 1 (1)              | 0 (0)              |
| Mitral valve incompetence                   | 0 (0)              | 3 (3)              | 0 (0)              |
| Mitral valve stenosis                       | 0 (0)              | 1 (1)              | 0 (0)              |
| Myocardial infarction                       | 7 (7)              | 4 (4)              | 9 (9)              |
| Palpitations                                | 0 (0)              | 0 (0)              | 2 (2)              |
| Pericardial effusion                        | 1 (1)              | 1 (1)              | 2 (1)              |
| Pericarditis                                | 0 (0)              | 0 (0)              | 1 (1)              |
| Supraventricular tachycardia                | 1 (1)              | 0 (0)              | 0 (0)              |
| Tachycardia                                 | 3 (2)              | 1 (1)              | 0 (0)              |



| <b>No. Events (No. Participants)</b>            | <b>Aflibercept</b> | <b>Bevacizumab</b> | <b>Ranibizumab</b> |
|-------------------------------------------------|--------------------|--------------------|--------------------|
| Tricuspid valve incompetence                    | 0 (0)              | 0 (0)              | 1 (1)              |
| Ventricular hypokinesia                         | 0 (0)              | 0 (0)              | 1 (1)              |
| Ventricular tachycardia                         | 0 (0)              | 0 (0)              | 3 (3)              |
| Wolff-Parkinson-White syndrome                  | 0 (0)              | 0 (0)              | 1 (1)              |
| <b>Ear and labyrinth disorders</b>              |                    |                    |                    |
| Cerumen impaction                               | 2 (2)              | 0 (0)              | 0 (0)              |
| Deafness                                        | 0 (0)              | 3 (3)              | 0 (0)              |
| Ear infection                                   | 8 (8)              | 3 (3)              | 1 (1)              |
| Ear pain                                        | 0 (0)              | 1 (1)              | 1 (1)              |
| Tinnitus                                        | 1 (1)              | 2 (2)              | 0 (0)              |
| <b>Endocrine disorders</b>                      |                    |                    |                    |
| Adrenal mass                                    | 0 (0)              | 1 (1)              | 0 (0)              |
| Autoimmune thyroiditis                          | 1 (1)              | 0 (0)              | 0 (0)              |
| Diabetes mellitus                               | 7 (6)              | 5 (5)              | 8 (7)              |
| Diabetes mellitus inadequate control            | 16 (15)            | 21 (19)            | 15 (14)            |
| Diabetic ketoacidosis                           | 2 (2)              | 3 (3)              | 2 (2)              |
| Glucocorticoid deficiency                       | 1 (1)              | 0 (0)              | 0 (0)              |
| Hyperglycaemia                                  | 8 (5)              | 4 (4)              | 5 (5)              |
| Hyperglycaemic hyperosmolar nonketotic syndrome | 0 (0)              | 0 (0)              | 1 (1)              |
| Hyperthyroidism                                 | 1 (1)              | 1 (1)              | 1 (1)              |
| Hypoglycaemia                                   | 16 (13)            | 12 (11)            | 12 (11)            |
| Hypothyroidism                                  | 8 (8)              | 1 (1)              | 4 (4)              |
| Thyroid neoplasm                                | 0 (0)              | 1 (1)              | 0 (0)              |
| Thyroiditis                                     | 0 (0)              | 1 (1)              | 0 (0)              |
| <b>Gastrointestinal disorders</b>               |                    |                    |                    |
| Abdominal discomfort                            | 5 (5)              | 8 (8)              | 2 (2)              |
| Abdominal distension                            | 1 (1)              | 0 (0)              | 1 (1)              |
| Abdominal pain                                  | 7 (5)              | 6 (4)              | 6 (5)              |
| Abdominal pain upper                            | 2 (2)              | 3 (3)              | 3 (3)              |
| Barrett's oesophagus                            | 1 (1)              | 0 (0)              | 0 (0)              |
| Clostridium difficile colitis                   | 2 (2)              | 1 (1)              | 4 (3)              |
| Colitis ischaemic                               | 0 (0)              | 2 (2)              | 0 (0)              |
| Colitis microscopic                             | 0 (0)              | 1 (1)              | 0 (0)              |
| Colitis ulcerative                              | 0 (0)              | 2 (2)              | 0 (0)              |
| Colon cancer                                    | 0 (0)              | 1 (1)              | 2 (2)              |
| Colorectal cancer                               | 0 (0)              | 0 (0)              | 1 (1)              |
| Constipation                                    | 7 (7)              | 12 (11)            | 8 (8)              |
| Dental caries                                   | 1 (1)              | 1 (1)              | 1 (1)              |
| Diabetic gastroparesis                          | 2 (2)              | 1 (1)              | 1 (1)              |
| Diarrhoea                                       | 11 (9)             | 18 (15)            | 15 (13)            |
| Diverticulum                                    | 1 (1)              | 1 (1)              | 2 (2)              |
| Duodenitis                                      | 0 (0)              | 1 (1)              | 0 (0)              |
| Dyspepsia                                       | 2 (2)              | 4 (4)              | 3 (3)              |

| <b>No. Events (No. Participants)</b>                        | <b>Aflibercept</b> | <b>Bevacizumab</b> | <b>Ranibizumab</b> |
|-------------------------------------------------------------|--------------------|--------------------|--------------------|
| Dysphagia                                                   | 1 (1)              | 0 (0)              | 0 (0)              |
| Faecal incontinence                                         | 0 (0)              | 0 (0)              | 1 (1)              |
| Gastric cancer stage I                                      | 0 (0)              | 0 (0)              | 1 (1)              |
| Gastric ulcer                                               | 0 (0)              | 3 (3)              | 2 (2)              |
| Gastritis                                                   | 0 (0)              | 2 (2)              | 2 (2)              |
| Gastroenteritis                                             | 1 (1)              | 5 (5)              | 2 (2)              |
| Gastroenteritis viral                                       | 12 (10)            | 8 (7)              | 14 (13)            |
| Gastrointestinal haemorrhage                                | 2 (2)              | 3 (2)              | 3 (2)              |
| Gastrointestinal stoma complication                         | 0 (0)              | 0 (0)              | 1 (1)              |
| Gastrooesophageal reflux disease                            | 14 (14)            | 9 (9)              | 3 (3)              |
| Haematochezia                                               | 1 (1)              | 0 (0)              | 1 (1)              |
| Haemorrhoids                                                | 3 (3)              | 1 (1)              | 1 (1)              |
| Hiatus hernia                                               | 0 (0)              | 1 (1)              | 1 (1)              |
| Impaired gastric emptying                                   | 1 (1)              | 0 (0)              | 5 (3)              |
| Intestinal obstruction                                      | 0 (0)              | 1 (1)              | 0 (0)              |
| Intestinal perforation                                      | 0 (0)              | 2 (2)              | 0 (0)              |
| Irritable bowel syndrome                                    | 1 (1)              | 0 (0)              | 0 (0)              |
| Large intestine polyp                                       | 3 (3)              | 1 (1)              | 1 (1)              |
| Nausea                                                      | 13 (12)            | 18 (12)            | 15 (13)            |
| Oesophageal varices haemorrhage                             | 0 (0)              | 2 (1)              | 0 (0)              |
| Oesophagitis                                                | 4 (4)              | 0 (0)              | 1 (1)              |
| Pancreatitis                                                | 1 (1)              | 1 (1)              | 1 (1)              |
| Peptic ulcer                                                | 0 (0)              | 1 (1)              | 1 (1)              |
| Rectal haemorrhage                                          | 2 (2)              | 0 (0)              | 0 (0)              |
| Rectal ulcer                                                | 0 (0)              | 0 (0)              | 1 (1)              |
| Tooth abscess                                               | 3 (3)              | 2 (2)              | 5 (5)              |
| Tooth fracture                                              | 2 (2)              | 1 (1)              | 0 (0)              |
| Tooth impacted                                              | 0 (0)              | 1 (1)              | 0 (0)              |
| Tooth infection                                             | 3 (3)              | 3 (3)              | 2 (2)              |
| Toothache                                                   | 4 (4)              | 1 (1)              | 1 (1)              |
| Vomiting                                                    | 24 (17)            | 14 (9)             | 11 (10)            |
| <b>General disorders and administration site conditions</b> |                    |                    |                    |
| Chest discomfort                                            | 1 (1)              | 0 (0)              | 6 (6)              |
| Chest pain                                                  | 10 (7)             | 11 (9)             | 9 (6)              |
| Chills                                                      | 1 (1)              | 0 (0)              | 2 (2)              |
| Cyst                                                        | 5 (4)              | 3 (3)              | 2 (2)              |
| Death                                                       | 3 (3)              | 4 (4)              | 4 (4)              |
| Device related infection                                    | 1 (1)              | 2 (2)              | 0 (0)              |
| Facial pain                                                 | 0 (0)              | 3 (3)              | 0 (0)              |
| Fatigue                                                     | 12 (11)            | 10 (9)             | 2 (2)              |
| Flank pain                                                  | 1 (1)              | 0 (0)              | 0 (0)              |
| Generalised oedema                                          | 0 (0)              | 0 (0)              | 2 (2)              |
| Hernia                                                      | 0 (0)              | 1 (1)              | 0 (0)              |
| Hot flush                                                   | 1 (1)              | 0 (0)              | 0 (0)              |

| <b>No. Events (No. Participants)</b> | <b>Aflibercept</b> | <b>Bevacizumab</b> | <b>Ranibizumab</b> |
|--------------------------------------|--------------------|--------------------|--------------------|
| Hypothermia                          | 1 (1)              | 0 (0)              | 0 (0)              |
| Lethargy                             | 0 (0)              | 2 (2)              | 1 (1)              |
| Local swelling                       | 4 (4)              | 1 (1)              | 2 (2)              |
| Necrosis                             | 0 (0)              | 1 (1)              | 1 (1)              |
| Oedema peripheral                    | 12 (11)            | 10 (10)            | 14 (11)            |
| Pain                                 | 6 (6)              | 6 (5)              | 8 (7)              |
| Pyrexia                              | 3 (3)              | 7 (6)              | 5 (4)              |
| Swelling                             | 4 (4)              | 4 (4)              | 3 (3)              |
| <b>Hepatobiliary disorders</b>       |                    |                    |                    |
| Cholecystitis acute                  | 0 (0)              | 1 (1)              | 3 (3)              |
| Cholecystitis chronic                | 1 (1)              | 1 (1)              | 0 (0)              |
| Cholelithiasis                       | 2 (2)              | 2 (2)              | 0 (0)              |
| Hepatic cirrhosis                    | 1 (1)              | 6 (3)              | 0 (0)              |
| Hepatic encephalopathy               | 0 (0)              | 2 (1)              | 0 (0)              |
| Hepatic failure                      | 0 (0)              | 1 (1)              | 0 (0)              |
| Porcelain gallbladder                | 0 (0)              | 1 (1)              | 0 (0)              |
| <b>Immune system disorders</b>       |                    |                    |                    |
| Drug hypersensitivity                | 1 (1)              | 1 (1)              | 1 (1)              |
| Heart transplant rejection           | 0 (0)              | 1 (1)              | 0 (0)              |
| Hypersensitivity                     | 3 (3)              | 4 (3)              | 1 (1)              |
| Immune thrombocytopenic purpura      | 0 (0)              | 1 (1)              | 0 (0)              |
| Seasonal allergy                     | 14 (14)            | 11 (11)            | 11 (11)            |
| Urticaria                            | 0 (0)              | 1 (1)              | 1 (1)              |
| <b>Infections and infestations</b>   |                    |                    |                    |
| Abscess                              | 5 (4)              | 1 (1)              | 1 (1)              |
| Bacteraemia                          | 0 (0)              | 0 (0)              | 1 (1)              |
| Blister infected                     | 1 (1)              | 0 (0)              | 0 (0)              |
| Candida infection                    | 0 (0)              | 1 (1)              | 0 (0)              |
| Diverticulitis                       | 2 (2)              | 1 (1)              | 0 (0)              |
| Escherichia infection                | 0 (0)              | 1 (1)              | 1 (1)              |
| Fungal infection                     | 3 (3)              | 0 (0)              | 1 (1)              |
| Fungal skin infection                | 1 (1)              | 1 (1)              | 1 (1)              |
| Gingival infection                   | 0 (0)              | 0 (0)              | 1 (1)              |
| Gingivitis                           | 0 (0)              | 1 (1)              | 0 (0)              |
| Helicobacter infection               | 1 (1)              | 1 (1)              | 0 (0)              |
| Infection                            | 4 (4)              | 15 (12)            | 9 (9)              |
| Influenza                            | 18 (16)            | 18 (17)            | 21 (20)            |
| Localised infection                  | 7 (6)              | 19 (15)            | 12 (9)             |
| Oral herpes                          | 1 (1)              | 0 (0)              | 0 (0)              |
| Post procedural infection            | 0 (0)              | 1 (1)              | 0 (0)              |
| Postoperative wound infection        | 1 (1)              | 0 (0)              | 1 (1)              |
| Sepsis                               | 4 (4)              | 4 (4)              | 4 (4)              |
| Septic shock                         | 0 (0)              | 1 (1)              | 0 (0)              |
| Staphylococcal infection             | 4 (3)              | 0 (0)              | 2 (2)              |

| <b>No. Events (No. Participants)</b>                  | <b>Aflibercept</b> | <b>Bevacizumab</b> | <b>Ranibizumab</b> |
|-------------------------------------------------------|--------------------|--------------------|--------------------|
| Streptococcal infection                               | 0 (0)              | 2 (2)              | 0 (0)              |
| Viral infection                                       | 1 (1)              | 1 (1)              | 0 (0)              |
| <b>Injury, poisoning and procedural complications</b> |                    |                    |                    |
| Accidental overdose                                   | 0 (0)              | 0 (0)              | 1 (1)              |
| Animal bite                                           | 1 (1)              | 0 (0)              | 1 (1)              |
| Arthropod bite                                        | 2 (2)              | 0 (0)              | 2 (2)              |
| Arthropod sting                                       | 4 (3)              | 0 (0)              | 0 (0)              |
| Asbestosis                                            | 1 (1)              | 0 (0)              | 0 (0)              |
| Burns second degree                                   | 0 (0)              | 1 (1)              | 1 (1)              |
| Chemical injury                                       | 0 (0)              | 0 (0)              | 1 (1)              |
| Fall                                                  | 14 (12)            | 24 (16)            | 14 (11)            |
| Fibula fracture                                       | 1 (1)              | 0 (0)              | 0 (0)              |
| Head injury                                           | 0 (0)              | 2 (2)              | 1 (1)              |
| Heat exhaustion                                       | 0 (0)              | 0 (0)              | 1 (1)              |
| Injury                                                | 1 (1)              | 0 (0)              | 0 (0)              |
| Joint injury                                          | 4 (4)              | 1 (1)              | 0 (0)              |
| Laceration                                            | 2 (2)              | 3 (3)              | 5 (5)              |
| Limb injury                                           | 2 (2)              | 3 (3)              | 3 (3)              |
| Post procedural complication                          | 0 (0)              | 1 (1)              | 0 (0)              |
| Pulmonary contusion                                   | 1 (1)              | 0 (0)              | 0 (0)              |
| Skin injury                                           | 0 (0)              | 1 (1)              | 0 (0)              |
| Spinal fracture                                       | 0 (0)              | 1 (1)              | 0 (0)              |
| Subgaleal haematoma                                   | 1 (1)              | 0 (0)              | 0 (0)              |
| Thermal burn                                          | 1 (1)              | 2 (2)              | 3 (3)              |
| Tibia fracture                                        | 2 (2)              | 0 (0)              | 0 (0)              |
| Wound                                                 | 2 (1)              | 2 (2)              | 0 (0)              |
| <b>Investigations</b>                                 |                    |                    |                    |
| Biopsy lymph gland                                    | 0 (0)              | 1 (1)              | 0 (0)              |
| Biopsy skin                                           | 0 (0)              | 0 (0)              | 1 (1)              |
| Blood creatine increased                              | 0 (0)              | 2 (2)              | 2 (2)              |
| Blood creatinine abnormal                             | 3 (3)              | 3 (3)              | 2 (2)              |
| Blood glucose decreased                               | 3 (3)              | 4 (4)              | 6 (5)              |
| Blood glucose increased                               | 2 (2)              | 2 (2)              | 1 (1)              |
| Blood lactic acid increased                           | 0 (0)              | 1 (1)              | 0 (0)              |
| Blood potassium decreased                             | 1 (1)              | 3 (3)              | 0 (0)              |
| Blood potassium increased                             | 2 (2)              | 2 (2)              | 5 (5)              |
| Blood testosterone decreased                          | 2 (2)              | 0 (0)              | 1 (1)              |
| Cardiac murmur                                        | 0 (0)              | 3 (3)              | 0 (0)              |
| Colonoscopy                                           | 1 (1)              | 0 (0)              | 0 (0)              |
| Glycosylated haemoglobin increased                    | 0 (0)              | 0 (0)              | 1 (1)              |
| Haematocrit abnormal                                  | 0 (0)              | 0 (0)              | 1 (1)              |
| Haemoglobin decreased                                 | 0 (0)              | 1 (1)              | 0 (0)              |
| Heart rate increased                                  | 1 (1)              | 0 (0)              | 0 (0)              |
| Heart rate irregular                                  | 0 (0)              | 1 (1)              | 0 (0)              |

| <b>No. Events (No. Participants)</b>                   | <b>Aflibercept</b> | <b>Bevacizumab</b> | <b>Ranibizumab</b> |
|--------------------------------------------------------|--------------------|--------------------|--------------------|
| Hepatic enzyme increased                               | 1 (1)              | 0 (0)              | 2 (2)              |
| International normalised ratio increased               | 4 (3)              | 0 (0)              | 1 (1)              |
| Laboratory test abnormal                               | 2 (2)              | 2 (2)              | 4 (2)              |
| Low density lipoprotein increased                      | 1 (1)              | 0 (0)              | 1 (1)              |
| Mammogram abnormal                                     | 1 (1)              | 0 (0)              | 0 (0)              |
| Mean cell haemoglobin increased                        | 0 (0)              | 1 (1)              | 0 (0)              |
| Monocyte count increased                               | 0 (0)              | 1 (1)              | 0 (0)              |
| Protein urine present                                  | 3 (3)              | 2 (2)              | 1 (1)              |
| Red blood cell count decreased                         | 1 (1)              | 1 (1)              | 1 (1)              |
| Troponin increased                                     | 1 (1)              | 2 (2)              | 1 (1)              |
| Weight decreased                                       | 1 (1)              | 0 (0)              | 1 (1)              |
| <b>Metabolism and nutrition disorders</b>              |                    |                    |                    |
| Abnormal weight gain                                   | 2 (2)              | 0 (0)              | 1 (1)              |
| Acidosis                                               | 0 (0)              | 1 (1)              | 1 (1)              |
| Calciophylaxis                                         | 0 (0)              | 1 (1)              | 0 (0)              |
| Decreased appetite                                     | 1 (1)              | 3 (3)              | 0 (0)              |
| Dehydration                                            | 11 (8)             | 4 (4)              | 13 (11)            |
| Failure to thrive                                      | 0 (0)              | 0 (0)              | 1 (1)              |
| Fluid overload                                         | 1 (1)              | 1 (1)              | 4 (2)              |
| Fluid retention                                        | 3 (3)              | 4 (4)              | 2 (2)              |
| Haemochromatosis                                       | 0 (0)              | 0 (0)              | 1 (1)              |
| Hypercalcaemia                                         | 0 (0)              | 1 (1)              | 0 (0)              |
| Hypercholesterolaemia                                  | 15 (15)            | 9 (9)              | 10 (10)            |
| Hyperkalaemia                                          | 6 (6)              | 4 (4)              | 4 (4)              |
| Hyperlipidaemia                                        | 8 (8)              | 5 (5)              | 5 (4)              |
| Hypermagnesaemia                                       | 0 (0)              | 0 (0)              | 1 (1)              |
| Hyperphosphataemia                                     | 2 (2)              | 2 (2)              | 3 (3)              |
| Hypertriglyceridaemia                                  | 1 (1)              | 1 (1)              | 1 (1)              |
| Hypoalbuminaemia                                       | 0 (0)              | 0 (0)              | 1 (1)              |
| Hypocalcaemia                                          | 0 (0)              | 0 (0)              | 1 (1)              |
| Hypokalaemia                                           | 3 (3)              | 2 (2)              | 1 (1)              |
| Hypomagnesaemia                                        | 0 (0)              | 0 (0)              | 3 (3)              |
| Hyponatraemia                                          | 1 (1)              | 1 (1)              | 0 (0)              |
| Iron deficiency                                        | 1 (1)              | 1 (1)              | 3 (3)              |
| Magnesium deficiency                                   | 0 (0)              | 1 (1)              | 0 (0)              |
| Malnutrition                                           | 0 (0)              | 2 (2)              | 0 (0)              |
| Metabolic disorder                                     | 1 (1)              | 1 (1)              | 1 (1)              |
| Obesity                                                | 1 (1)              | 1 (1)              | 2 (2)              |
| Type 2 diabetes mellitus                               | 1 (1)              | 0 (0)              | 0 (0)              |
| Vitamin B12 deficiency                                 | 0 (0)              | 1 (1)              | 1 (1)              |
| Vitamin D deficiency                                   | 4 (4)              | 1 (1)              | 13 (12)            |
| <b>Musculoskeletal and connective tissue disorders</b> |                    |                    |                    |
| Ankle fracture                                         | 2 (2)              | 0 (0)              | 2 (2)              |
| Arthralgia                                             | 9 (9)              | 8 (7)              | 13 (11)            |

| <b>No. Events (No. Participants)</b> | <b>Aflibercept</b> | <b>Bevacizumab</b> | <b>Ranibizumab</b> |
|--------------------------------------|--------------------|--------------------|--------------------|
| Arthritis                            | 2 (2)              | 2 (2)              | 4 (4)              |
| Back pain                            | 15 (13)            | 21 (19)            | 21 (17)            |
| Bone pain                            | 0 (0)              | 1 (1)              | 0 (0)              |
| Bursitis                             | 1 (1)              | 1 (1)              | 2 (2)              |
| Clavicle fracture                    | 1 (1)              | 0 (0)              | 0 (0)              |
| Coccydynia                           | 0 (0)              | 2 (2)              | 0 (0)              |
| Dupuytren's contracture              | 0 (0)              | 3 (2)              | 0 (0)              |
| Exostosis                            | 2 (2)              | 1 (1)              | 1 (1)              |
| Facial bones fracture                | 0 (0)              | 0 (0)              | 1 (1)              |
| Femoral neck fracture                | 0 (0)              | 1 (1)              | 0 (0)              |
| Femur fracture                       | 0 (0)              | 1 (1)              | 0 (0)              |
| Fibromyalgia                         | 1 (1)              | 0 (0)              | 2 (2)              |
| Foot deformity                       | 0 (0)              | 1 (1)              | 3 (2)              |
| Foot fracture                        | 7 (7)              | 4 (4)              | 0 (0)              |
| Fractured coccyx                     | 0 (0)              | 1 (1)              | 0 (0)              |
| Gout                                 | 1 (1)              | 4 (4)              | 1 (1)              |
| Hand fracture                        | 2 (2)              | 0 (0)              | 2 (1)              |
| Hip fracture                         | 1 (1)              | 1 (1)              | 1 (1)              |
| Inclusion body myositis              | 1 (1)              | 0 (0)              | 0 (0)              |
| Intervertebral disc degeneration     | 0 (0)              | 3 (3)              | 0 (0)              |
| Intervertebral disc protrusion       | 1 (1)              | 3 (2)              | 1 (1)              |
| Ligament sprain                      | 7 (6)              | 4 (3)              | 9 (8)              |
| Lipoma                               | 0 (0)              | 1 (1)              | 0 (0)              |
| Lower limb fracture                  | 1 (1)              | 1 (1)              | 1 (1)              |
| Meniscus injury                      | 0 (0)              | 2 (2)              | 1 (1)              |
| Multiple fractures                   | 4 (4)              | 3 (3)              | 5 (5)              |
| Muscle spasms                        | 6 (6)              | 9 (9)              | 2 (2)              |
| Muscle strain                        | 1 (1)              | 2 (2)              | 3 (3)              |
| Muscular weakness                    | 6 (6)              | 4 (4)              | 7 (7)              |
| Musculoskeletal discomfort           | 2 (2)              | 2 (2)              | 0 (0)              |
| Musculoskeletal pain                 | 4 (4)              | 9 (9)              | 6 (6)              |
| Myalgia                              | 1 (1)              | 4 (3)              | 1 (1)              |
| Neck pain                            | 1 (1)              | 3 (3)              | 4 (4)              |
| Neuropathic arthropathy              | 2 (1)              | 2 (2)              | 1 (1)              |
| Osteoarthritis                       | 2 (2)              | 3 (3)              | 5 (5)              |
| Osteomyelitis                        | 3 (3)              | 6 (5)              | 5 (5)              |
| Osteoporosis                         | 0 (0)              | 3 (3)              | 0 (0)              |
| Pain in extremity                    | 7 (6)              | 14 (11)            | 9 (9)              |
| Pelvic fracture                      | 2 (2)              | 0 (0)              | 0 (0)              |
| Plantar fasciitis                    | 2 (2)              | 0 (0)              | 1 (1)              |
| Psoriatic arthropathy                | 0 (0)              | 0 (0)              | 1 (1)              |
| Rhabdomyolysis                       | 0 (0)              | 0 (0)              | 1 (1)              |
| Rheumatoid arthritis                 | 1 (1)              | 3 (2)              | 0 (0)              |
| Rib fracture                         | 2 (2)              | 2 (2)              | 2 (2)              |

| <b>No. Events (No. Participants)</b>                                      | <b>Aflibercept</b> | <b>Bevacizumab</b> | <b>Ranibizumab</b> |
|---------------------------------------------------------------------------|--------------------|--------------------|--------------------|
| Rotator cuff syndrome                                                     | 2 (2)              | 0 (0)              | 2 (2)              |
| Spinal osteoarthritis                                                     | 1 (1)              | 0 (0)              | 0 (0)              |
| Tendon disorder                                                           | 0 (0)              | 1 (1)              | 0 (0)              |
| Tendonitis                                                                | 5 (5)              | 0 (0)              | 2 (2)              |
| Trigger finger                                                            | 3 (3)              | 1 (1)              | 3 (3)              |
| Upper limb fracture                                                       | 2 (2)              | 1 (1)              | 2 (2)              |
| Wrist fracture                                                            | 3 (3)              | 3 (3)              | 1 (1)              |
| <b>Neoplasms benign, malignant and unspecified(incl cysts and polyps)</b> |                    |                    |                    |
| Hepatic cancer                                                            | 1 (1)              | 0 (0)              | 0 (0)              |
| Lung cancer metastatic                                                    | 1 (1)              | 0 (0)              | 0 (0)              |
| Neoplasm                                                                  | 1 (1)              | 0 (0)              | 0 (0)              |
| Neoplasm malignant                                                        | 0 (0)              | 1 (1)              | 0 (0)              |
| Polyp                                                                     | 1 (1)              | 2 (2)              | 4 (3)              |
| Squamous cell carcinoma                                                   | 2 (1)              | 2 (1)              | 2 (2)              |
| <b>Nervous system disorders</b>                                           |                    |                    |                    |
| Amnesia                                                                   | 0 (0)              | 2 (2)              | 0 (0)              |
| Ataxia                                                                    | 0 (0)              | 1 (1)              | 0 (0)              |
| Balance disorder                                                          | 3 (2)              | 3 (3)              | 2 (2)              |
| Brain neoplasm                                                            | 0 (0)              | 0 (0)              | 2 (2)              |
| Carpal tunnel syndrome                                                    | 5 (2)              | 1 (1)              | 1 (1)              |
| Cerebral atrophy                                                          | 1 (1)              | 0 (0)              | 0 (0)              |
| Concussion                                                                | 0 (0)              | 0 (0)              | 1 (1)              |
| Convulsion                                                                | 0 (0)              | 1 (1)              | 12 (5)             |
| Dementia                                                                  | 0 (0)              | 0 (0)              | 2 (2)              |
| Dementia Alzheimer's type                                                 | 0 (0)              | 2 (2)              | 0 (0)              |
| Diabetic neuropathy                                                       | 3 (3)              | 9 (9)              | 6 (6)              |
| Dizziness                                                                 | 15 (13)            | 7 (7)              | 16 (14)            |
| Dysarthria                                                                | 1 (1)              | 0 (0)              | 0 (0)              |
| Encephalopathy                                                            | 2 (2)              | 4 (2)              | 2 (2)              |
| Epilepsy                                                                  | 0 (0)              | 0 (0)              | 1 (1)              |
| Gait disturbance                                                          | 1 (1)              | 0 (0)              | 0 (0)              |
| Head discomfort                                                           | 0 (0)              | 0 (0)              | 1 (1)              |
| Headache                                                                  | 26 (20)            | 27 (19)            | 23 (20)            |
| Hemiparesis                                                               | 2 (2)              | 0 (0)              | 0 (0)              |
| Hydrocephalus                                                             | 0 (0)              | 0 (0)              | 1 (1)              |
| Hypoaesthesia                                                             | 1 (1)              | 2 (2)              | 2 (2)              |
| Hypogeusia                                                                | 0 (0)              | 1 (1)              | 0 (0)              |
| Meningioma                                                                | 0 (0)              | 0 (0)              | 1 (1)              |
| Migraine                                                                  | 8 (7)              | 2 (2)              | 2 (2)              |
| Multiple sclerosis                                                        | 0 (0)              | 0 (0)              | 1 (1)              |
| Nerve compression                                                         | 0 (0)              | 2 (2)              | 0 (0)              |
| Nerve injury                                                              | 1 (1)              | 1 (1)              | 1 (1)              |
| Neuropathy peripheral                                                     | 5 (5)              | 6 (6)              | 10 (9)             |
| Paraesthesia                                                              | 1 (1)              | 1 (1)              | 0 (0)              |

| <b>No. Events (No. Participants)</b> | <b>Aflibercept</b> | <b>Bevacizumab</b> | <b>Ranibizumab</b> |
|--------------------------------------|--------------------|--------------------|--------------------|
| Presyncope                           | 2 (2)              | 4 (3)              | 2 (2)              |
| Radiculitis brachial                 | 0 (0)              | 0 (0)              | 1 (1)              |
| Restless legs syndrome               | 2 (2)              | 0 (0)              | 1 (1)              |
| Sciatica                             | 3 (3)              | 1 (1)              | 3 (3)              |
| Seizure                              | 0 (0)              | 0 (0)              | 2 (2)              |
| Somnolence                           | 1 (1)              | 1 (1)              | 0 (0)              |
| Spinal column stenosis               | 2 (2)              | 0 (0)              | 1 (1)              |
| Syncope                              | 1 (1)              | 1 (1)              | 9 (9)              |
| Tremor                               | 0 (0)              | 0 (0)              | 1 (1)              |
| VIIIth nerve paralysis               | 5 (4)              | 0 (0)              | 2 (2)              |
| Vertigo                              | 9 (8)              | 6 (5)              | 3 (3)              |
| Vestibular neuronitis                | 1 (1)              | 0 (0)              | 0 (0)              |
| <b>Psychiatric disorders</b>         |                    |                    |                    |
| Affect lability                      | 0 (0)              | 0 (0)              | 1 (1)              |
| Anxiety                              | 9 (9)              | 10 (8)             | 7 (7)              |
| Bipolar disorder                     | 1 (1)              | 0 (0)              | 3 (2)              |
| Delirium                             | 0 (0)              | 1 (1)              | 0 (0)              |
| Depression                           | 11 (11)            | 12 (10)            | 8 (7)              |
| Drug abuse                           | 0 (0)              | 0 (0)              | 1 (1)              |
| Insomnia                             | 5 (4)              | 6 (6)              | 4 (4)              |
| Mental disorder                      | 2 (2)              | 6 (3)              | 2 (2)              |
| Panic attack                         | 1 (1)              | 1 (1)              | 0 (0)              |
| Psychotic disorder                   | 0 (0)              | 0 (0)              | 3 (2)              |
| Schizoaffective disorder             | 0 (0)              | 0 (0)              | 1 (1)              |
| Stress                               | 0 (0)              | 2 (2)              | 0 (0)              |
| <b>Renal and urinary disorders</b>   |                    |                    |                    |
| Acute kidney injury                  | 1 (1)              | 2 (2)              | 1 (1)              |
| Acute prerenal failure               | 0 (0)              | 0 (0)              | 1 (1)              |
| Azotaemia                            | 0 (0)              | 0 (0)              | 1 (1)              |
| Bladder cancer                       | 0 (0)              | 1 (1)              | 0 (0)              |
| Bladder prolapse                     | 0 (0)              | 0 (0)              | 1 (1)              |
| Bladder spasm                        | 0 (0)              | 0 (0)              | 1 (1)              |
| Chronic kidney disease               | 3 (3)              | 0 (0)              | 5 (5)              |
| Cystitis                             | 9 (7)              | 3 (2)              | 2 (2)              |
| Cystitis haemorrhagic                | 1 (1)              | 0 (0)              | 0 (0)              |
| Diabetic nephropathy                 | 0 (0)              | 1 (1)              | 0 (0)              |
| Dysuria                              | 1 (1)              | 0 (0)              | 0 (0)              |
| Glomerulonephritis membranous        | 0 (0)              | 1 (1)              | 0 (0)              |
| Haematuria                           | 1 (1)              | 8 (8)              | 1 (1)              |
| Hydronephrosis                       | 0 (0)              | 0 (0)              | 1 (1)              |
| Hypertonic bladder                   | 1 (1)              | 1 (1)              | 0 (0)              |
| Kidney infection                     | 2 (2)              | 1 (1)              | 4 (4)              |
| Microalbuminuria                     | 2 (2)              | 0 (0)              | 0 (0)              |
| Micturition urgency                  | 0 (0)              | 0 (0)              | 3 (3)              |



| <b>No. Events (No. Participants)</b>                   | <b>Aflibercept</b> | <b>Bevacizumab</b> | <b>Ranibizumab</b> |
|--------------------------------------------------------|--------------------|--------------------|--------------------|
| Nephrolithiasis                                        | 4 (4)              | 3 (3)              | 3 (3)              |
| Nephropathy                                            | 4 (4)              | 4 (4)              | 2 (2)              |
| Nephrotic syndrome                                     | 1 (1)              | 0 (0)              | 0 (0)              |
| Proteinuria                                            | 2 (2)              | 3 (3)              | 1 (1)              |
| Renal cyst                                             | 2 (2)              | 0 (0)              | 0 (0)              |
| Renal disorder                                         | 0 (0)              | 1 (1)              | 0 (0)              |
| Renal failure                                          | 12 (12)            | 17 (13)            | 14 (12)            |
| Renal failure acute                                    | 6 (5)              | 8 (7)              | 7 (7)              |
| Renal failure chronic                                  | 15 (14)            | 10 (8)             | 15 (10)            |
| Renal impairment                                       | 7 (7)              | 4 (4)              | 3 (3)              |
| Urinary hesitation                                     | 0 (0)              | 1 (1)              | 0 (0)              |
| Urinary incontinence                                   | 1 (1)              | 1 (1)              | 2 (2)              |
| Urinary retention                                      | 0 (0)              | 1 (1)              | 1 (1)              |
| Urinary tract infection                                | 25 (17)            | 30 (22)            | 13 (12)            |
| <b>Reproductive system and breast disorders</b>        |                    |                    |                    |
| Benign prostatic hyperplasia                           | 2 (2)              | 0 (0)              | 1 (1)              |
| Breast cancer                                          | 0 (0)              | 1 (1)              | 0 (0)              |
| Endometrial hyperplasia                                | 0 (0)              | 2 (1)              | 0 (0)              |
| Erectile dysfunction                                   | 0 (0)              | 1 (1)              | 2 (2)              |
| Fibrocystic breast disease                             | 0 (0)              | 0 (0)              | 1 (1)              |
| Ovarian neoplasm                                       | 1 (1)              | 0 (0)              | 0 (0)              |
| Penile necrosis                                        | 0 (0)              | 0 (0)              | 1 (1)              |
| Prostatitis                                            | 0 (0)              | 0 (0)              | 2 (2)              |
| Prostatomegaly                                         | 1 (1)              | 2 (2)              | 3 (3)              |
| Uterine leiomyoma                                      | 3 (3)              | 0 (0)              | 0 (0)              |
| Uterine prolapse                                       | 0 (0)              | 1 (1)              | 0 (0)              |
| <b>Respiratory, thoracic and mediastinal disorders</b> |                    |                    |                    |
| Acute respiratory failure                              | 3 (3)              | 2 (2)              | 5 (5)              |
| Asthma                                                 | 6 (5)              | 3 (3)              | 2 (2)              |
| Atelectasis                                            | 1 (1)              | 2 (2)              | 0 (0)              |
| Bronchitis                                             | 15 (12)            | 22 (13)            | 13 (11)            |
| Cardio-respiratory arrest                              | 0 (0)              | 1 (1)              | 0 (0)              |
| Chronic obstructive pulmonary disease                  | 1 (1)              | 4 (3)              | 2 (2)              |
| Chronic respiratory disease                            | 0 (0)              | 1 (1)              | 0 (0)              |
| Chronic sinusitis                                      | 1 (1)              | 1 (1)              | 1 (1)              |
| Cough                                                  | 23 (22)            | 14 (11)            | 17 (14)            |
| Dyspnoea                                               | 10 (9)             | 15 (10)            | 12 (10)            |
| Epistaxis                                              | 5 (2)              | 1 (1)              | 2 (2)              |
| Haemoptysis                                            | 0 (0)              | 0 (0)              | 1 (1)              |
| Hiccups                                                | 0 (0)              | 0 (0)              | 1 (1)              |
| Hypercapnia                                            | 1 (1)              | 0 (0)              | 0 (0)              |
| Hypoxia                                                | 0 (0)              | 4 (4)              | 2 (2)              |
| Laryngitis                                             | 1 (1)              | 0 (0)              | 0 (0)              |
| Nasal congestion                                       | 6 (6)              | 8 (7)              | 4 (4)              |

| <b>No. Events (No. Participants)</b>          | <b>Aflibercept</b> | <b>Bevacizumab</b> | <b>Ranibizumab</b> |
|-----------------------------------------------|--------------------|--------------------|--------------------|
| Nasal dryness                                 | 1 (1)              | 0 (0)              | 0 (0)              |
| Nasopharyngitis                               | 46 (39)            | 49 (38)            | 35 (29)            |
| Obstructive airways disorder                  | 0 (0)              | 1 (1)              | 0 (0)              |
| Oropharyngeal pain                            | 3 (3)              | 8 (8)              | 4 (4)              |
| Pharyngitis streptococcal                     | 2 (2)              | 1 (1)              | 0 (0)              |
| Pleural effusion                              | 0 (0)              | 1 (1)              | 0 (0)              |
| Pneumonia                                     | 12 (9)             | 18 (17)            | 22 (18)            |
| Pneumonia aspiration                          | 0 (0)              | 1 (1)              | 0 (0)              |
| Pulmonary embolism                            | 0 (0)              | 0 (0)              | 2 (2)              |
| Pulmonary fibrosis                            | 1 (1)              | 0 (0)              | 0 (0)              |
| Pulmonary hypertension                        | 0 (0)              | 1 (1)              | 1 (1)              |
| Pulmonary oedema                              | 0 (0)              | 2 (1)              | 3 (3)              |
| Respiratory distress                          | 0 (0)              | 0 (0)              | 1 (1)              |
| Respiratory tract congestion                  | 0 (0)              | 2 (2)              | 1 (1)              |
| Respiratory tract infection                   | 4 (4)              | 2 (2)              | 3 (2)              |
| Respiratory tract oedema                      | 0 (0)              | 1 (1)              | 0 (0)              |
| Rhinalgia                                     | 1 (1)              | 0 (0)              | 0 (0)              |
| Rhinitis allergic                             | 1 (1)              | 5 (5)              | 2 (2)              |
| Rhinorrhoea                                   | 0 (0)              | 1 (1)              | 0 (0)              |
| Sinusitis                                     | 22 (20)            | 14 (13)            | 31 (18)            |
| Sleep apnoea syndrome                         | 3 (3)              | 4 (4)              | 3 (3)              |
| Sneezing                                      | 1 (1)              | 0 (0)              | 0 (0)              |
| Upper respiratory tract infection             | 21 (15)            | 11 (10)            | 25 (19)            |
| Upper-airway cough syndrome                   | 0 (0)              | 1 (1)              | 0 (0)              |
| Wheezing                                      | 2 (2)              | 0 (0)              | 2 (2)              |
| <b>Skin and subcutaneous tissue disorders</b> |                    |                    |                    |
| Acne                                          | 2 (1)              | 0 (0)              | 0 (0)              |
| Actinic keratosis                             | 0 (0)              | 0 (0)              | 2 (1)              |
| Alopecia                                      | 1 (1)              | 1 (1)              | 3 (3)              |
| Angioedema                                    | 0 (0)              | 0 (0)              | 1 (1)              |
| Basal cell carcinoma                          | 5 (5)              | 2 (2)              | 2 (2)              |
| Blister                                       | 1 (1)              | 2 (2)              | 0 (0)              |
| Cellulitis                                    | 14 (12)            | 17 (14)            | 13 (12)            |
| Cellulitis gangrenous                         | 0 (0)              | 1 (1)              | 0 (0)              |
| Contusion                                     | 3 (3)              | 4 (3)              | 1 (1)              |
| Dermal cyst                                   | 1 (1)              | 0 (0)              | 1 (1)              |
| Dermatitis allergic                           | 2 (2)              | 1 (1)              | 1 (1)              |
| Dermatitis contact                            | 2 (1)              | 1 (1)              | 0 (0)              |
| Diabetic foot                                 | 2 (2)              | 8 (7)              | 10 (8)             |
| Diabetic ulcer                                | 0 (0)              | 1 (1)              | 1 (1)              |
| Ecchymosis                                    | 1 (1)              | 0 (0)              | 1 (1)              |
| Eczema                                        | 0 (0)              | 0 (0)              | 1 (1)              |
| Excoriation                                   | 3 (3)              | 3 (3)              | 1 (1)              |
| Furuncle                                      | 5 (3)              | 1 (1)              | 7 (3)              |

| <b>No. Events (No. Participants)</b>   | <b>Aflibercept</b> | <b>Bevacizumab</b> | <b>Ranibizumab</b> |
|----------------------------------------|--------------------|--------------------|--------------------|
| Gangrene                               | 1 (1)              | 2 (1)              | 2 (2)              |
| Herpes zoster                          | 2 (2)              | 1 (1)              | 3 (3)              |
| Hyperhidrosis                          | 0 (0)              | 0 (0)              | 2 (2)              |
| Hyperkeratosis                         | 1 (1)              | 4 (4)              | 0 (0)              |
| Ingrowing nail                         | 0 (0)              | 4 (3)              | 0 (0)              |
| Malignant melanoma                     | 0 (0)              | 1 (1)              | 0 (0)              |
| Melanocytic naevus                     | 1 (1)              | 0 (0)              | 1 (1)              |
| Nail avulsion                          | 0 (0)              | 0 (0)              | 1 (1)              |
| Night sweats                           | 1 (1)              | 0 (0)              | 0 (0)              |
| Onychogryphosis                        | 0 (0)              | 1 (1)              | 0 (0)              |
| Onychomycosis                          | 1 (1)              | 1 (1)              | 1 (1)              |
| Pruritus                               | 2 (2)              | 2 (2)              | 0 (0)              |
| Psoriasis                              | 0 (0)              | 1 (1)              | 0 (0)              |
| Rash                                   | 6 (5)              | 4 (4)              | 3 (3)              |
| Skin abrasion                          | 1 (1)              | 1 (1)              | 0 (0)              |
| Skin bacterial infection               | 1 (1)              | 2 (2)              | 1 (1)              |
| Skin cancer                            | 0 (0)              | 2 (2)              | 2 (2)              |
| Skin disorder                          | 0 (0)              | 0 (0)              | 1 (1)              |
| Skin infection                         | 8 (8)              | 1 (1)              | 2 (2)              |
| Skin lesion                            | 1 (1)              | 0 (0)              | 3 (2)              |
| Skin papilloma                         | 1 (1)              | 0 (0)              | 2 (1)              |
| Skin ulcer                             | 5 (5)              | 2 (2)              | 2 (2)              |
| <b>Social circumstances</b>            |                    |                    |                    |
| Menopause                              | 0 (0)              | 1 (1)              | 0 (0)              |
| <b>Surgical and medical procedures</b> |                    |                    |                    |
| Cardiac pacemaker insertion            | 0 (0)              | 1 (1)              | 1 (1)              |
| Cardiac pacemaker replacement          | 1 (1)              | 0 (0)              | 0 (0)              |
| Cataract operation                     | 0 (0)              | 0 (0)              | 1 (1)              |
| Cholecystectomy                        | 0 (0)              | 3 (3)              | 1 (1)              |
| Coronary arterial stent insertion      | 0 (0)              | 2 (2)              | 0 (0)              |
| Cystopexy                              | 0 (0)              | 1 (1)              | 0 (0)              |
| Dental implantation                    | 0 (0)              | 1 (1)              | 0 (0)              |
| Endodontic procedure                   | 0 (0)              | 1 (1)              | 1 (1)              |
| Foot amputation                        | 0 (0)              | 1 (1)              | 0 (0)              |
| Gastric bypass                         | 1 (1)              | 0 (0)              | 0 (0)              |
| Heart transplant                       | 0 (0)              | 1 (1)              | 0 (0)              |
| Hip arthroplasty                       | 0 (0)              | 0 (0)              | 1 (1)              |
| Hyperbaric oxygen therapy              | 0 (0)              | 1 (1)              | 0 (0)              |
| Implantable defibrillator insertion    | 0 (0)              | 0 (0)              | 1 (1)              |
| Inguinal hernia repair                 | 1 (1)              | 0 (0)              | 0 (0)              |
| Knee operation                         | 0 (0)              | 0 (0)              | 1 (1)              |
| Leg amputation                         | 0 (0)              | 2 (2)              | 1 (1)              |
| Sinus operation                        | 0 (0)              | 1 (1)              | 0 (0)              |
| Skin lesion excision                   | 1 (1)              | 0 (0)              | 0 (0)              |

| <b>No. Events (No. Participants)</b> | <b>Aflibercept</b> | <b>Bevacizumab</b> | <b>Ranibizumab</b> |
|--------------------------------------|--------------------|--------------------|--------------------|
| Stent placement                      | 2 (2)              | 2 (2)              | 0 (0)              |
| Surgery                              | 2 (2)              | 2 (2)              | 6 (4)              |
| Toe amputation                       | 0 (0)              | 1 (1)              | 2 (2)              |
| Tooth extraction                     | 6 (6)              | 5 (4)              | 4 (4)              |
| Uterine dilation and curettage       | 1 (1)              | 0 (0)              | 0 (0)              |
| Vitrectomy                           | 1 (1)              | 0 (0)              | 0 (0)              |
| <b>Vascular disorders</b>            |                    |                    |                    |
| Aortic aneurysm                      | 0 (0)              | 1 (1)              | 0 (0)              |
| Aortic stenosis                      | 1 (1)              | 1 (1)              | 0 (0)              |
| Arteriosclerosis                     | 0 (0)              | 2 (2)              | 0 (0)              |
| Arteriovenous fistula                | 4 (3)              | 1 (1)              | 6 (5)              |
| Basilar artery occlusion             | 0 (0)              | 0 (0)              | 1 (1)              |
| Carotid artery disease               | 0 (0)              | 0 (0)              | 1 (1)              |
| Carotid artery stenosis              | 1 (1)              | 0 (0)              | 0 (0)              |
| Cerebral infarction                  | 0 (0)              | 0 (0)              | 1 (1)              |
| Cerebrovascular accident             | 1 (1)              | 4 (4)              | 10 (8)             |
| Deep vein thrombosis                 | 2 (2)              | 3 (2)              | 1 (1)              |
| Embolism                             | 1 (1)              | 1 (1)              | 1 (1)              |
| Haematoma                            | 3 (3)              | 1 (1)              | 1 (1)              |
| Haemorrhagic stroke                  | 1 (1)              | 1 (1)              | 1 (1)              |
| Hypertension                         | 44 (39)            | 32 (26)            | 53 (44)            |
| Hypertensive crisis                  | 0 (0)              | 1 (1)              | 0 (0)              |
| Hypotension                          | 3 (3)              | 2 (2)              | 4 (4)              |
| Ischaemia                            | 0 (0)              | 0 (0)              | 1 (1)              |
| Ischaemic stroke                     | 0 (0)              | 1 (1)              | 5 (4)              |
| Orthostatic hypotension              | 2 (2)              | 2 (2)              | 0 (0)              |
| Peripheral ischaemia                 | 0 (0)              | 0 (0)              | 1 (1)              |
| Peripheral vascular disorder         | 3 (2)              | 5 (5)              | 3 (3)              |
| Peripheral venous disease            | 1 (1)              | 0 (0)              | 0 (0)              |
| Poor peripheral circulation          | 0 (0)              | 0 (0)              | 1 (1)              |
| Raynaud's phenomenon                 | 1 (1)              | 0 (0)              | 0 (0)              |
| Transient ischaemic attack           | 1 (1)              | 3 (3)              | 7 (5)              |
| Venous insufficiency                 | 0 (0)              | 1 (1)              | 2 (1)              |
| Venous stenosis                      | 1 (1)              | 0 (0)              | 1 (1)              |

Events based on medical monitor using Medical Dictionary for Regulatory Activities coding.

**Table S16. 2 Year Anti-Platelet Trialists' Collaboration (APTC) <sup>5</sup> Event Rates Across DME and AMD Studies Comparing Ranibizumab vs. Control or Other Anti-VEGF Agents**

| Study                                                                                | Treatment Group            |      |                       |      |                        |      |                       |      |                       |      |
|--------------------------------------------------------------------------------------|----------------------------|------|-----------------------|------|------------------------|------|-----------------------|------|-----------------------|------|
|                                                                                      | Control<br>(Laser or Sham) |      | Aflibercept<br>0.5 mg |      | Bevacizumab<br>1.25 mg |      | Ranibizumab<br>0.3 mg |      | Ranibizumab<br>0.5 mg |      |
| N participants in denominator /<br>% of participants with at least<br>one APTC event | N                          | %    | N                     | %    | N                      | %    | N                     | %    | N                     | %    |
| <b>DME Trials</b>                                                                    |                            |      |                       |      |                        |      |                       |      |                       |      |
| RISE/RIDE Pooled <sup>6</sup>                                                        | 250                        | 5.2% |                       |      |                        |      | 250                   | 5.6% | 250                   | 7.2% |
| RISE                                                                                 | 123                        | 4.9% |                       |      |                        |      | 125                   | 2.4% | 126                   | 8.7% |
| RIDE                                                                                 | 127                        | 5.5% |                       |      |                        |      | 125                   | 8.8% | 124                   | 5.6% |
| DRCR.net Protocol I <sup>7</sup>                                                     | 130                        | 13%  |                       |      |                        |      |                       |      | 375                   | 7%   |
| DRCR.net Protocol T                                                                  |                            |      | 224                   | 5%   | 218                    | 8%   |                       |      | 218                   | 12%  |
| RESTORE <sup>12</sup>                                                                | 110                        | 4.5% |                       |      |                        |      |                       |      | 235                   | 3.4% |
| <b>CNV in AMD Trials</b>                                                             |                            |      |                       |      |                        |      |                       |      |                       |      |
| IVAN <sup>8</sup>                                                                    |                            |      |                       |      | 296                    | 3%   |                       |      | 314                   | 4%   |
| CATT <sup>9</sup>                                                                    |                            |      |                       |      | 586                    | 5.0% |                       |      | 599                   | 4.7% |
| VIEW* <sup>10</sup>                                                                  |                            |      | 601                   | 3.8% |                        |      |                       |      | 595                   | 3.2% |

\*96 weeks instead of 2 years

## References

1. Diabetic Retinopathy Clinical Research N, Wells JA, Glassman AR, et al. Aflibercept, bevacizumab, or ranibizumab for diabetic macular edema. *N Engl J Med*. 2015;372(13):1193-203.
2. Hochberg Y. A sharper bonferroni procedure for multiple tests of significance. *Biometrika*. 1988;75(4):800-2.
3. Schafer J. Multiple imputation: a primer. *Statistical Methods in Medical Research*. 1999;8:3-15.
4. Spiegelman D, Hertzmark E. Easy SAS calculations for risk or prevalence ratios and differences. *Am J Epidemiol*. 2005;162(3):199-200.
5. Antiplatelet Trialists' Collaboration. Collaborative overview of randomised trials of antiplatelet therapy--I: Prevention of death, myocardial infarction, and stroke by prolonged antiplatelet therapy in various categories of patients. *BMJ*. 1994;308(6921):81-106.
6. Nguyen QD, Brown DM, Marcus DM, et al. Ranibizumab for Diabetic Macular Edema: Results from 2 Phase III Randomized Trials: RISE and RIDE. *Ophthalmology*. 2012;119(4):789-801.
7. Elman MJ, Bressler NM, Qin H, et al. Expanded 2-year follow-up of ranibizumab plus prompt or deferred laser or triamcinolone plus prompt laser for diabetic macular edema. *Ophthalmology*. 2011;118(4):609-14.
8. Chakravarthy U, Harding SP, Rogers CA, et al. Alternative treatments to inhibit VEGF in age-related choroidal neovascularisation: 2-year findings of the IVAN randomised controlled trial. *Lancet*. 2013.
9. Comparison of Age-related Macular Degeration Trials (CATT) Research Group, Martin DF, Maguire MG, et al. Ranibizumab and Bevacizumab for Treatment of Neovascular Age-related Macular Degeneration: Two-Year Results. *Ophthalmology*. 2012;119(7):1388-98.
10. Schmidt-Erfurth U, Kaiser PK, Korobelnik JF, et al. Intravitreal aflibercept injection for neovascular age-related macular degeneration: ninety-six-week results of the VIEW studies. *Ophthalmology*. 2014;121(1):193-201.
11. Brown DM, Schmidt-Erfurth U, Do DV, et al. Intravitreal Aflibercept for Diabetic Macular Edema: 100-Week Results From the VISTA and VIVID Studies. *Ophthalmology*. 2015.
12. Food and Drug Administration. Dermatologic and Ophthalmic Drugs Advisory Committee Meeting. <http://www.fda.gov/downloads/advisorycommittees/committeesmeetingmaterials/drugs/dermatologicandophthalmicdrugsadvisorycommittee/ucm314199.pdf>. Accessed January 25, 2016.
